# Supplementary material for: Highly efficient carbazolylgold(iii) dendrimers based on thermally activated delayed fluorescence and their application in solution-processed organic light-emitting devices
Source: Royal Society of Chemistry journal article supplement (doi:10.1039/d1sc03690d), 2021-01-01
Supplement: d1sc03690d1.pdf [file d1sc03690d1.pdf]

## Supporting Information

### **Highly Efficient Carbazolygold(III) Dendrimers Based on Thermally Activated Delayed Fluorescence and Their Application in Solution-Processed Organic Light-Emitting Devices**

*Lok-Kwan Li, Wing-Kei Kwok, Man-Chung Tang, Wai-Lung Cheung, Shiu-Lun Lai, Maggie Ng, Mei-Yee Chan, \* Vivian Wing-Wah Yam\**

[\*] Dr. L.-K. Li, Ms. W.-K. Kwok, Dr. M.-C. Tang, Mr. W.-L. Cheung, Dr. S.-L. Lai, Dr. M. Ng, Dr. M.-Y. Chan, \* Prof. V. W.-W. Yam\*

Institute of Molecular Functional Materials and Department of Chemistry, The University of Hong Kong, Pokfulam Road, Hong Kong (P. R. China)

Fax: +(852) 2857-1586; Tel: +(852) 2859-2153

E-mail: wwyam@hku.hk; chanmym@hku.hk

## Table of Contents

|                                                                                                                                                        | <b>Page</b> |
|--------------------------------------------------------------------------------------------------------------------------------------------------------|-------------|
| <b><u>Thermogravimetric Analyses</u></b>                                                                                                               |             |
| <b>Figure S1.</b> Thermogravimetric analysis (TGA) curves of <b>1–3</b> .                                                                              | S4          |
| <b>Table S1.</b> Thermal properties of <b>1–3</b> .                                                                                                    | S4          |
| <b><u>Photophysical Properties</u></b>                                                                                                                 |             |
| <b>Figure S2.</b> Normalized PL spectra of <b>1</b> doped at 5–20 wt% in mCP thin films at 298 K.                                                      | S5          |
| <b>Figure S3.</b> Normalized PL spectra of <b>2</b> doped at 5–20 wt% in mCP thin films at 298 K.                                                      | S5          |
| <b>Figure S4.</b> Normalized PL spectra of <b>3</b> doped at 5–20 wt% in mCP thin films at 298 K.                                                      | S6          |
| <b>Figure S5.</b> Normalized time-resolved emission spectra of 20 wt% <b>3</b> doped into mCP and (b) neat (non-doped) thin film of <b>3</b> at 298 K. | S7          |
| <b>Figure S6.</b> Emission spectra of 20 wt% <b>1</b> doped in mCP thin film upon increasing the temperature from 320 to 360 K.                        | S8          |
| <b><u>Computational Studies</u></b>                                                                                                                    |             |
| <b>Figure S7.</b> Optimized ground-state geometries (upper: front view; lower: side view) of (a) <b>1</b> , (b) <b>2</b> and (c) <b>3</b> .            | S9          |
| <b>Table S2.</b> The first thirtieth singlet excited states ( $S_n$ ) of <b>1–3</b> computed by TDDFT/CPCM using toluene as the solvent.               | S10         |
| <b>Figure S8.</b> Simulated UV-vis spectrum of <b>1</b> computed by TDDFT/CPCM using toluene as the solvent.                                           | S13         |
| <b>Figure S9.</b> Simulated UV-vis spectrum of <b>2</b> computed by TDDFT/CPCM using toluene as the solvent.                                           | S13         |
| <b>Figure S10.</b> Simulated UV-vis spectrum of <b>3</b> computed by TDDFT/CPCM using toluene as the solvent.                                          | S14         |
| <b>Table S3.</b> Relative energies of the optimized $T_1$ states of <b>1–3</b> .                                                                       | S14         |
| <b>Table S4.</b> Cartesian coordinates of the optimized ground-state geometry of <b>2</b> .                                                            | S15         |
| <b>Table S5.</b> Cartesian coordinates of the optimized ground-state geometry of <b>3</b> .                                                            | S16         |
| <b>Table S6.</b> Cartesian coordinates of the optimized $T_1$ geometry of <b>2</b> computed by DFT/CPCM.                                               | S18         |
| <b>Table S7.</b> Cartesian coordinates of the optimized $T_1$ geometry of <b>3</b> computed by DFT/CPCM.                                               | S19         |
| <b>Table S8.</b> Cartesian coordinates of the optimized $S_1$ geometry of <b>1</b> computed by TDA-TDDFT/CPCM.                                         | S20         |
| <b>Table S9.</b> Cartesian coordinates of the optimized $S_1$ geometry of <b>2</b> computed by TDA-TDDFT/CPCM.                                         | S21         |
| <b>Table S10.</b> Cartesian coordinates of the optimized $S_1$ geometry of <b>3</b> computed by TDA-TDDFT/CPCM.                                        | S22         |
| <b>Table S11.</b> Cartesian coordinates of the optimized $T_1$ geometry of <b>1</b> computed by TDA-TDDFT/CPCM.                                        | S24         |
| <b>Table S12.</b> Cartesian coordinates of the optimized $T_1$ geometry of <b>2</b> computed by TDA-TDDFT/CPCM.                                        | S25         |
| <b>Table S13.</b> Cartesian coordinates of the optimized $T_1$ geometry of <b>3</b> computed by TDA-TDDFT/CPCM.                                        | S26         |
| <b>Figure S11.</b> Spatial plots (isovalue = 0.03) of selected molecular orbitals of <b>1</b> at the optimized ground-state geometry.                  | S28         |
| <b>Figure S12.</b> Spatial plots (isovalue = 0.03) of selected molecular orbitals of <b>2</b> at the optimized ground-state geometry.                  | S28         |
| <b>Figure S13.</b> Spatial plots (isovalue = 0.03) of selected molecular orbitals of <b>3</b> at the                                                   | S29         |

|                                                     |                                                                                                               |     |
|-----------------------------------------------------|---------------------------------------------------------------------------------------------------------------|-----|
|                                                     | optimized ground-state geometry.                                                                              |     |
| <b>Figure S14.</b>                                  | Orbital energy diagram of <b>1–3</b> .                                                                        | S29 |
| <b>Figure S15.</b>                                  | Plots of spin density (isovalue = 0.002) of the T <sub>1</sub> of <b>1–3</b> .                                | S30 |
| <b><u>OLED Fabrication and Characterization</u></b> |                                                                                                               |     |
| <b>Figure S16.</b>                                  | Normalized EL spectra of the solution-processed OLEDs based on (a) <b>1</b> , (b) <b>2</b> and (c) <b>3</b> . | S31 |
| <b>Table S14.</b>                                   | Key parameters of the solution-processed OLEDs based on <b>1–3</b> .                                          | S32 |
| <b>Table S15</b>                                    | Summary of the EL performance of some representative TADF-based solution-processed OLEDs                      | S32 |
| <b>Figure S17.</b>                                  | Relative luminance, $L/L_0$ , of the solution-processed OLEDs based on <b>1</b> and <b>3</b> .                | S33 |
| <b>Table S16.</b>                                   | Lifetime data of the solution-processed OLEDs based on <b>1</b> and <b>3</b> .                                | S33 |
| <b><u>Experimental Details</u></b>                  |                                                                                                               |     |
|                                                     | <b>Materials and Reagents</b>                                                                                 | S34 |
|                                                     | <b>Physical Measurements and Instrumentation</b>                                                              | S34 |
|                                                     | <b>Synthesis and Characterization</b>                                                                         | S35 |
|                                                     | <b>Computational Details</b>                                                                                  | S36 |
|                                                     | <b>OLED Fabrication and Characterization</b>                                                                  | S37 |
|                                                     | <b>References</b>                                                                                             | S38 |

## Thermogravimetric Analysis

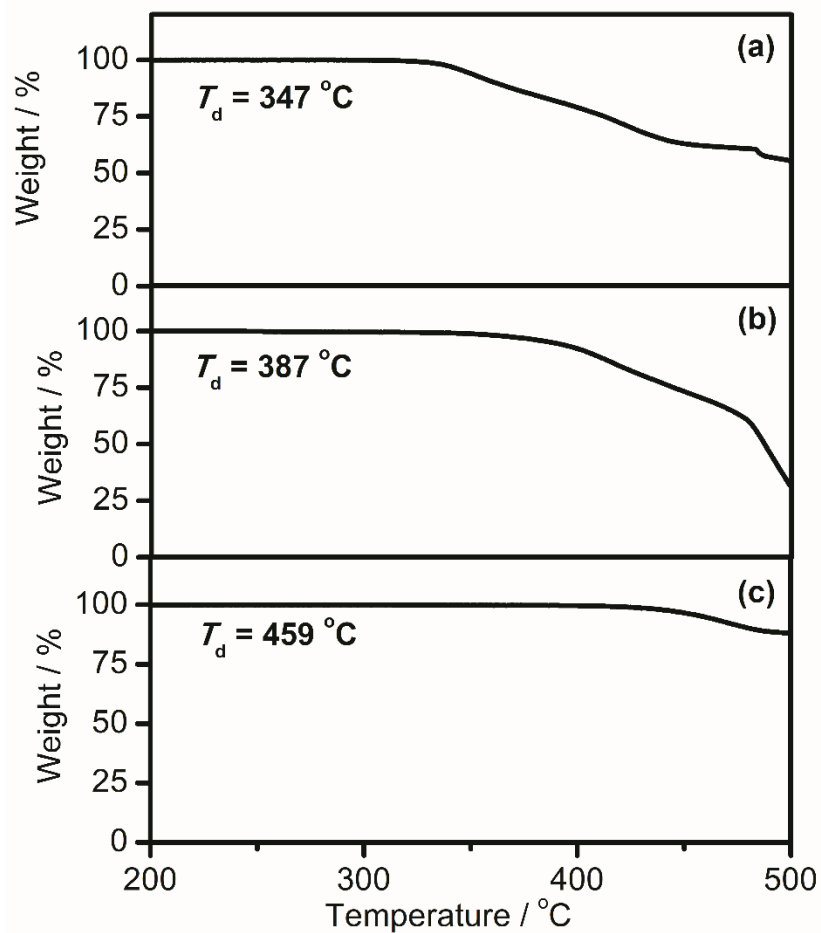

**Figure S1.** Thermogravimetric analysis (TGA) curves of (a) **1**, (b) **2** and (c) **3**.

**Table S1.** Thermal properties of **1–3**.

| Complex  | $T_d^a$ / °C |
|----------|--------------|
| <b>1</b> | 347          |
| <b>2</b> | 387          |
| <b>3</b> | 459          |

<sup>a</sup>  $T_d$  is defined as the temperature at which the material showed a 5 % weight loss.

## Photophysical Properties

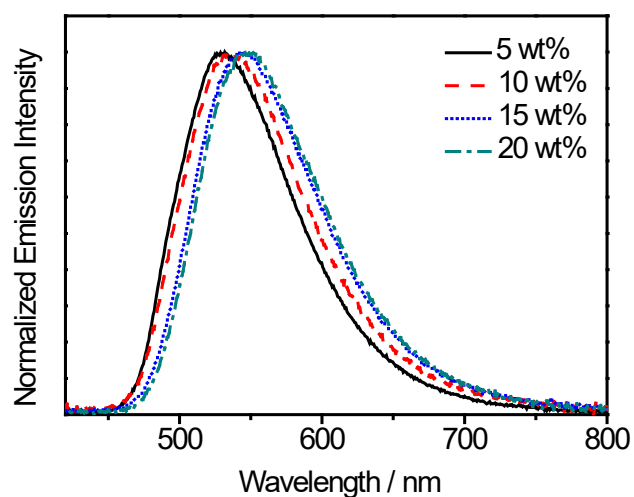

**Figure S2.** Normalized emission spectra of thin films of **1** doped into mCP at different concentrations (wt%) at 298 K.

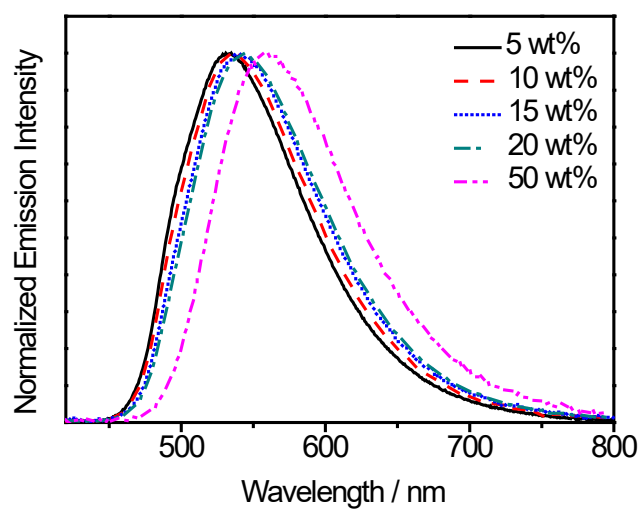

**Figure S3.** Normalized emission spectra of thin films of **2** doped into mCP at different concentrations (wt%) at 298 K.

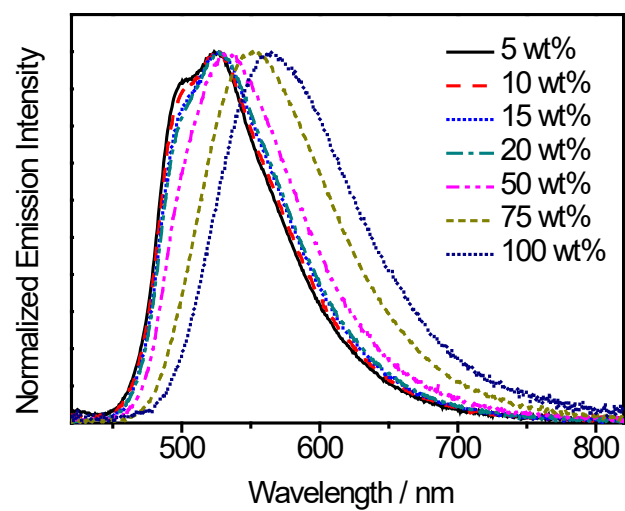

**Figure S4.** Normalized emission spectra of thin films of **3** doped into mCP at different concentrations (wt%) at 298 K.

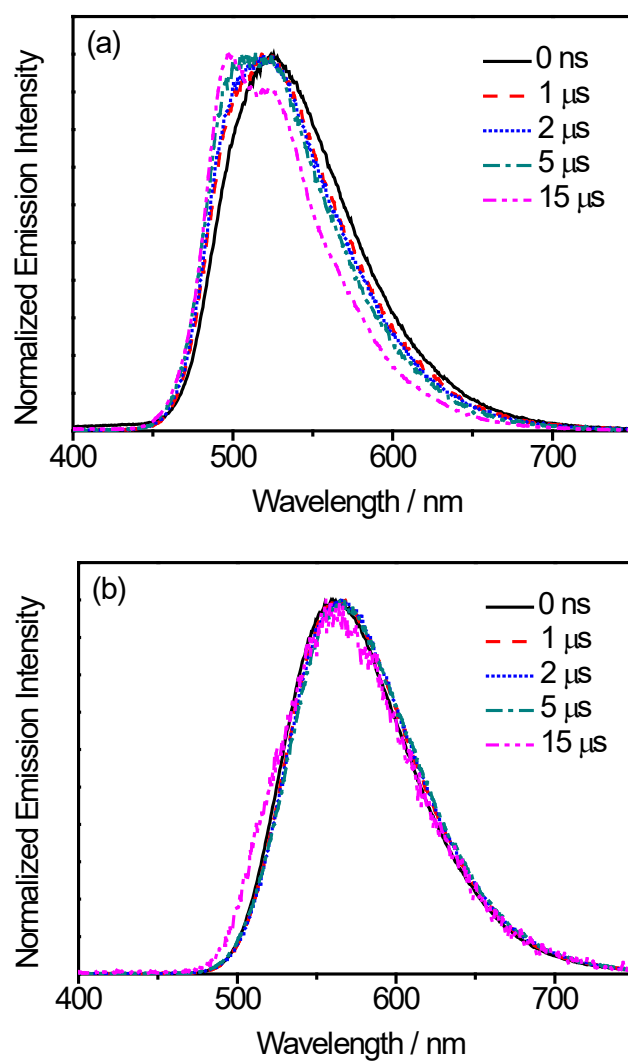

**Figure S5.** Normalized time-resolved emission spectra of (a) 20 wt% **3** doped into mCP thin film and (b) neat (non-doped) film of **3** at 298 K.

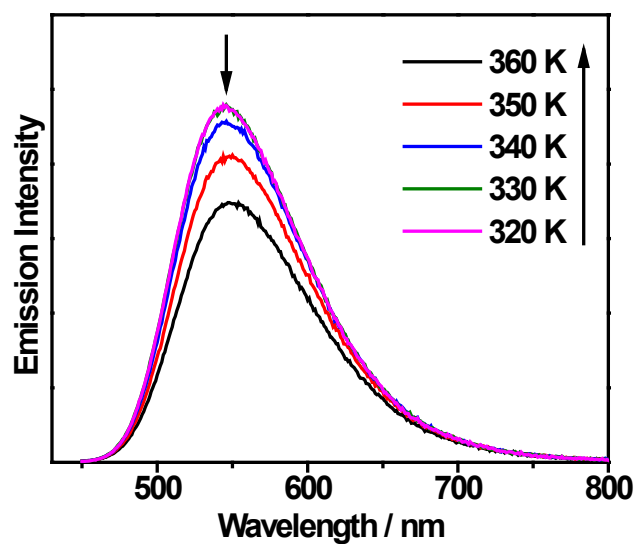

**Figure S6.** Emission spectra of 20 wt% **1** doped in mCP thin film upon increasing the temperature from 320 to 360 K.



## Computational Studies

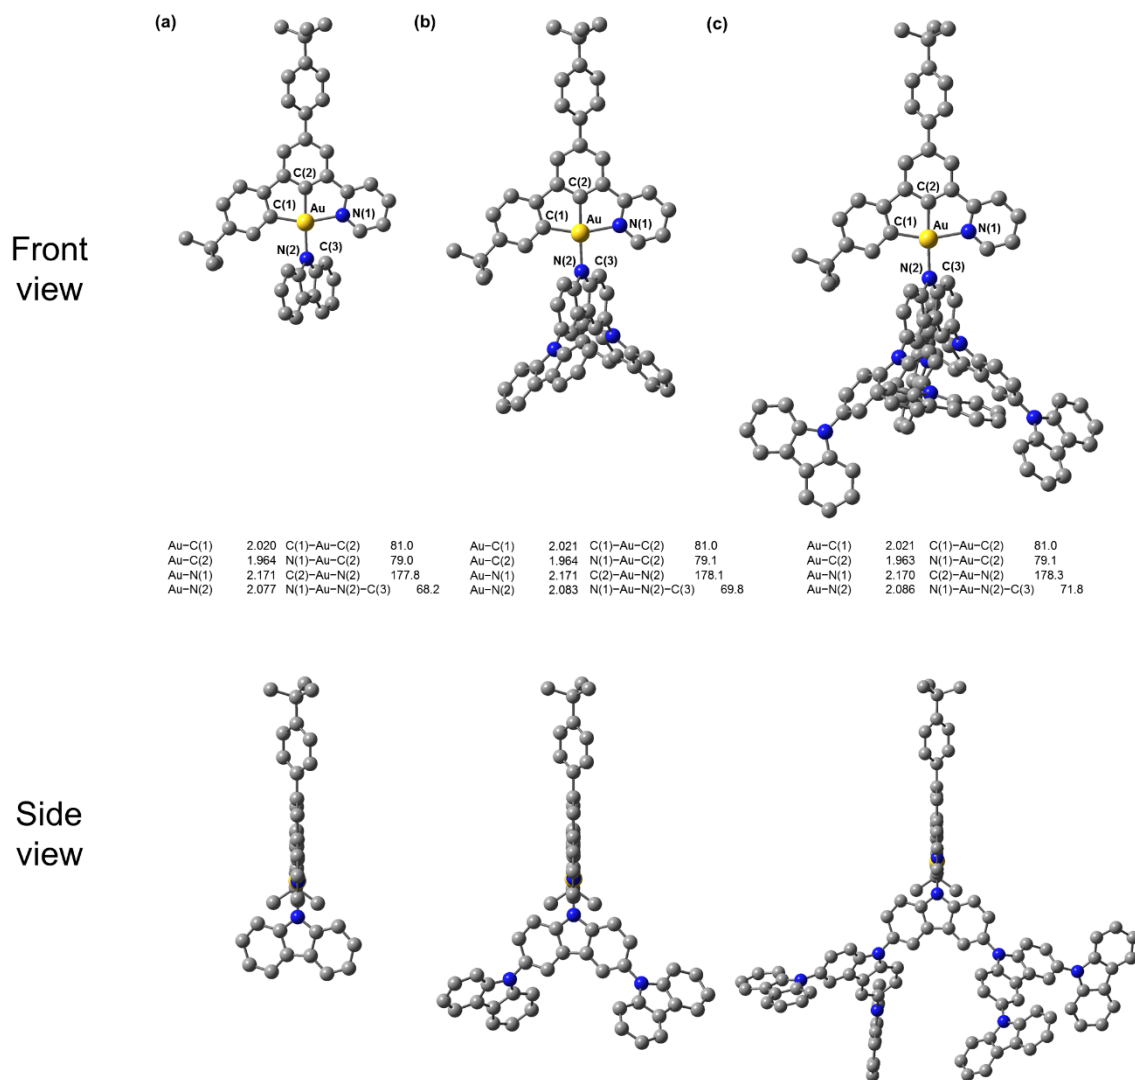

**Figure S7.** Optimized ground-state geometries (upper: front view; lower: side view) of (a) **1**, (b) **2** and (c) **3** at the PBE0 level of theory. The bond lengths and angles are in Angstroms and degrees, respectively. All hydrogen atoms are omitted for clarity.

**Table S2.** The first thirtieth singlet excited states ( $S_n$ ) of **1–3** computed by TDDFT/CPCM using toluene as the solvent.

| Complex      | $S_n$          | Excitation <sup>a</sup><br>(Coefficient) <sup>b</sup> | Vertical excitation<br>wavelength / nm | $F^c$     | Character <sup>d</sup> |
|--------------|----------------|-------------------------------------------------------|----------------------------------------|-----------|------------------------|
| <b>1</b>     | $S_1$          | H→L (0.70)                                            | 520                                    | 0.005     | LLCT                   |
|              | $S_2$          | H-1→L (0.70)                                          | 411                                    | 0.000     | LLCT                   |
|              | $S_3$          | H→L+1 (0.70)                                          | 409                                    | 0.003     | LLCT                   |
|              | $S_4$          | H-2→L (0.69)                                          | 378                                    | 0.077     | IL/ILCT                |
|              | $S_5$          | H→L+2 (0.69)                                          | 358                                    | 0.013     | LLCT                   |
|              | $S_6$          | H→L+3 (0.69)                                          | 355                                    | 0.025     | LLCT                   |
|              | $S_7$          | H-1→L+1 (0.70)                                        | 340                                    | 0.001     | LLCT                   |
|              | $S_8$          | H-3→L (0.68)                                          | 328                                    | 0.089     | ILCT/IL                |
|              | $S_9$          | H-2→L+1 (0.66)                                        | 320                                    | 0.106     | ILCT/IL                |
|              | $S_{10}$       | H→L+5 (0.62)                                          | 319                                    | 0.075     | IL                     |
|              | $S_{11}$       | H-1→L+2 (0.70)                                        | 303                                    | 0.001     | LLCT                   |
|              | $S_{12}$       | H-4→L (0.69)                                          | 301                                    | 0.009     | LLCT                   |
|              | $S_{13}$       | H→L+4 (0.62)                                          | 297                                    | 0.003     | LLCT                   |
|              | $S_{14}$       | H-1→L+3 (0.70)                                        | 294                                    | 0.003     | LLCT                   |
|              | $S_{15}$       | H-3→L+1 (0.43)                                        | 291                                    | 0.048     | ILCT/IL                |
|              |                | H-2→L+2 (0.31)                                        |                                        |           | ILCT/IL                |
|              | $S_{16}$       | H-2→L+3 (0.64)                                        | 291                                    | 0.007     | IL                     |
|              | $S_{17}$       | H-5→L (0.63)                                          | 288                                    | 0.136     | ILCT                   |
|              | $S_{18}$       | H-2→L+2 (0.59)                                        | 282                                    | 0.030     | IL/ILCT                |
|              | $S_{19}$       | H-7→L (0.47)                                          | 279                                    | 0.658     | ILCT/IL                |
|              |                | H-3→L+1 (-0.38)                                       |                                        |           | IL/ILCT                |
|              | $S_{20}$       | H→L+7 (0.64)                                          | 278                                    | 0.004     | LLCT                   |
|              | $S_{21}$       | H-1→L+5 (0.54)                                        | 277                                    | 0.102     | IL                     |
|              |                | H→L+9 (-0.34)                                         |                                        |           | IL                     |
|              | $S_{22}$       | H-6→L (0.63)                                          | 270                                    | 0.005     | ILCT                   |
|              | $S_{23}$       | H-5→L+1 (0.47)                                        | 266                                    | 0.116     | ILCT/IL                |
|              |                | H-4→L+1 (0.35)                                        |                                        |           | LLCT                   |
|              | $S_{24}$       | H→L+8 (0.61)                                          | 264                                    | 0.005     | LMCT                   |
|              |                | H→L+6 (-0.32)                                         |                                        |           | LLCT                   |
|              | $S_{25}$       | H→L+6 (0.59)                                          | 262                                    | 0.001     | LLCT                   |
| H→L+8 (0.32) |                |                                                       |                                        | LMCT      |                        |
| $S_{26}$     | H-9→L (0.53)   | 260                                                   | 0.003                                  | LLCT/ILCT |                        |
|              | H-8→L (0.36)   |                                                       |                                        | LLCT      |                        |
| $S_{27}$     | H-1→L+4 (0.61) | 260                                                   | 0.001                                  | LLCT      |                        |
| $S_{28}$     | H-4→L+1 (0.61) | 259                                                   | 0.006                                  | LLCT      |                        |
| $S_{29}$     | H-3→L+2 (0.65) | 257                                                   | 0.413                                  | IL/ILCT   |                        |
| $S_{30}$     | H-2→L+4 (0.62) | 254                                                   | 0.503                                  | IL/ILCT   |                        |
| <b>2</b>     | $S_1$          | H→L (0.69)                                            | 502                                    | 0.004     | LLCT                   |
|              | $S_2$          | H-1→L (0.70)                                          | 424                                    | 0.000     | LLCT                   |
|              | $S_3$          | H→L+1 (0.69)                                          | 398                                    | 0.001     | LLCT                   |
|              | $S_4$          | H-6→L (0.56)                                          | 381                                    | 0.069     | IL/ILCT                |
|              |                | H-2→L (0.40)                                          |                                        |           | LLCT                   |
| $S_5$        | H-2→L (0.56)   | 376                                                   | 0.013                                  | LLCT      |                        |
|              | H-6→L (-0.40)  |                                                       |                                        | IL/ILCT   |                        |

|                 |                 |              |       |         |      |
|-----------------|-----------------|--------------|-------|---------|------|
| S <sub>6</sub>  | H-5→L (0.53)    | 360          | 0.000 | LLCT    |      |
|                 | H-4→L (-0.35)   |              |       | LLCT    |      |
|                 | H-3→L (-0.30)   |              |       | LLCT    |      |
| S <sub>7</sub>  | H-4→L (0.58)    | 357          | 0.000 | LLCT    |      |
|                 | H-3→L (-0.37)   |              |       | LLCT    |      |
| S <sub>8</sub>  | H-3→L (0.52)    | 356          | 0.000 | LLCT    |      |
|                 | H-5→L (0.42)    |              |       | LLCT    |      |
| S <sub>9</sub>  | H→L+2 (0.53)    | 351          | 0.013 | LLCT    |      |
|                 | H-1→L+1 (-0.43) |              |       | LLCT    |      |
| S <sub>10</sub> | H-1→L+1 (0.55)  | 349          | 0.006 | LLCT    |      |
|                 | H→L+2 (0.41)    |              |       | LLCT    |      |
| S <sub>11</sub> | H→L+3 (0.66)    | 347          | 0.016 | LLCT    |      |
| S <sub>12</sub> | H→L+4 (0.68)    | 341          | 0.048 | IL      |      |
| S <sub>13</sub> | H-7→L (0.68)    | 331          | 0.077 | IL/ILCT |      |
| S <sub>14</sub> | H-6→L+1 (0.61)  | 321          | 0.099 | IL/ILCT |      |
|                 | H-2→L+1 (0.30)  |              |       | LLCT    |      |
| S <sub>15</sub> | H-2→L+1 (0.62)  | 317          | 0.015 | LLCT    |      |
| S <sub>16</sub> | H→L+5 (0.54)    | 315          | 0.097 | ILCT/IL |      |
|                 | H-1→L+5 (-0.31) |              |       | ILCT/IL |      |
| S <sub>17</sub> | H→L+6 (0.55)    | 314          | 0.060 | ILCT/IL |      |
|                 | H-1→L+6 (0.31)  |              |       | ILCT/IL |      |
| S <sub>18</sub> | H-1→L+2 (0.54)  | 311          | 0.019 | LLCT    |      |
|                 | H-1→L+4 (-0.37) |              |       | ILCT/IL |      |
| S <sub>19</sub> | H-1→L+2 (0.43)  | 309          | 0.046 | LLCT    |      |
|                 | H-1→L+4 (0.47)  |              |       | ILCT/IL |      |
| S <sub>20</sub> | H-3→L+1 (0.47)  | 305          | 0.000 | LLCT    |      |
|                 | H-5→L+1 (-0.41) |              |       | LLCT    |      |
|                 | H-4→L+1 (0.33)  |              |       | LLCT    |      |
| S <sub>21</sub> | H-4→L+1 (0.54)  | 306          | 0.000 | LLCT    |      |
|                 | H-3→L+1 (-0.44) |              |       | LLCT    |      |
| S <sub>22</sub> | H-5→L+1 (0.56)  | 302          | 0.000 | LLCT    |      |
|                 | H-4→L+1 (0.31)  |              |       | LLCT    |      |
| S <sub>23</sub> | H-1→L+3 (0.61)  | 298          | 0.005 | LLCT    |      |
|                 | H-1→L+4 (0.31)  |              |       | ILCT/IL |      |
| S <sub>24</sub> | H-6→L+3 (0.65)  | 295          | 0.000 | IL      |      |
| S <sub>25</sub> | H-7→L+1 (0.43)  | 292          | 0.046 | ILCT/IL |      |
|                 | H-10→L (0.31)   |              |       | LLCT    |      |
| S <sub>26</sub> | H→L+7 (0.64)    | 291          | 0.007 | LLCT    |      |
| S <sub>27</sub> | H-10→L (0.52)   | 290          | 0.133 | LLCT    |      |
| S <sub>28</sub> | H→L+10 (0.48)   | 286          | 0.184 | IL/ILCT |      |
|                 | H-2→L+2 (0.34)  |              |       | LLCT    |      |
| S <sub>29</sub> | H-2→L+2 (0.44)  | 286          | 0.154 | LLCT    |      |
|                 | H→L+10 (-0.37)  |              |       | IL/ILCT |      |
| S <sub>30</sub> | H-1→L+5 (0.52)  | 284          | 0.006 | ILCT/IL |      |
|                 | H→L+5 (0.36)    |              |       | ILCT/IL |      |
| <b>3</b>        | S <sub>1</sub>  | H→L (0.63)   | 477   | 0.003   | LLCT |
|                 |                 | H-4→L (0.30) |       |         | LLCT |
|                 | S <sub>2</sub>  | H-1→L (0.70) | 432   | 0.000   | LLCT |
|                 | S <sub>3</sub>  | H-4→L (0.61) | 410   | 0.003   | LLCT |

|                 |                 |     |       |         |
|-----------------|-----------------|-----|-------|---------|
|                 | H→L (-0.31)     |     |       | LLCT    |
| S <sub>4</sub>  | H-3→L (0.69)    | 401 | 0.000 | LLCT    |
| S <sub>5</sub>  | H-2→L (0.70)    | 400 | 0.000 | LLCT    |
| S <sub>6</sub>  | H→L+1 (0.60)    | 382 | 0.015 | LLCT    |
| S <sub>7</sub>  | H-10→L (0.64)   | 381 | 0.067 | IL/ILCT |
| S <sub>8</sub>  | H-9→L (0.65)    | 366 | 0.000 | LLCT    |
| S <sub>9</sub>  | H-1→L+1 (0.70)  | 355 | 0.000 | LLCT    |
| S <sub>10</sub> | H-8→L (0.65)    | 350 | 0.000 | LLCT    |
| S <sub>11</sub> | H-6→L (0.66)    | 350 | 0.000 | LLCT    |
| S <sub>12</sub> | H-7→L (0.70)    | 350 | 0.000 | LLCT    |
| S <sub>13</sub> | H-5→L (0.71)    | 349 | 0.000 | LLCT    |
| S <sub>14</sub> | H→L+3 (0.56)    | 345 | 0.036 | IL      |
|                 | H-1→L+3 (-0.40) |     |       | IL      |
| S <sub>15</sub> | H→L+4 (0.52)    | 343 | 0.034 | IL      |
|                 | H-1→L+4 (0.44)  |     |       | IL      |
| S <sub>16</sub> | H→L+5 (0.55)    | 341 | 0.014 | IL      |
| S <sub>17</sub> | H-4→L+1 (0.62)  | 340 | 0.001 | LLCT    |
| S <sub>18</sub> | H→L+2 (0.57)    | 337 | 0.010 | LLCT    |
| S <sub>19</sub> | H→L+6 (0.49)    | 335 | 0.051 | IL      |
|                 | H-4→L+6 (0.33)  |     |       | IL      |
|                 | H-15→L (-0.31)  |     |       | ILCT/IL |
| S <sub>20</sub> | H-2→L+1 (0.53)  | 334 | 0.000 | LLCT    |
|                 | H-3→L+1 (0.44)  |     |       | LLCT    |
| S <sub>21</sub> | H-3→L+1 (0.53)  | 334 | 0.000 | LLCT    |
|                 | H-2→L+1 (-0.46) |     |       | LLCT    |
| S <sub>22</sub> | H-15→L (0.56)   | 333 | 0.069 | ILCT/IL |
| S <sub>23</sub> | H-12→L (0.62)   | 331 | 0.001 | LLCT    |
| S <sub>24</sub> | H-11→L (0.64)   | 329 | 0.005 | LLCT    |
| S <sub>25</sub> | H-10→L+1 (0.65) | 321 | 0.071 | ILCT/IL |
| S <sub>26</sub> | H-3→L+3 (0.67)  | 320 | 0.100 | ILCT/IL |
| S <sub>27</sub> | H-2→L+4 (0.67)  | 320 | 0.078 | ILCT/IL |
| S <sub>28</sub> | H-14→L (0.63)   | 320 | 0.000 | LLCT    |
|                 | H-13→L (-0.31)  |     |       | LLCT    |
| S <sub>29</sub> | H-13→L (0.62)   | 319 | 0.000 | LLCT    |
| S <sub>30</sub> | H-1→L+5 (0.51)  | 317 | 0.091 | IL      |
|                 | H-1→L+2 (0.37)  |     |       | LLCT    |

<sup>a</sup> Orbitals involved in the major excitation (H = HOMO and L = LUMO).

<sup>b</sup> The coefficients in the configuration interaction (CI) expansion that are less than 0.3 are not listed.

<sup>c</sup> Oscillator strengths.

<sup>d</sup> Character of the transition.

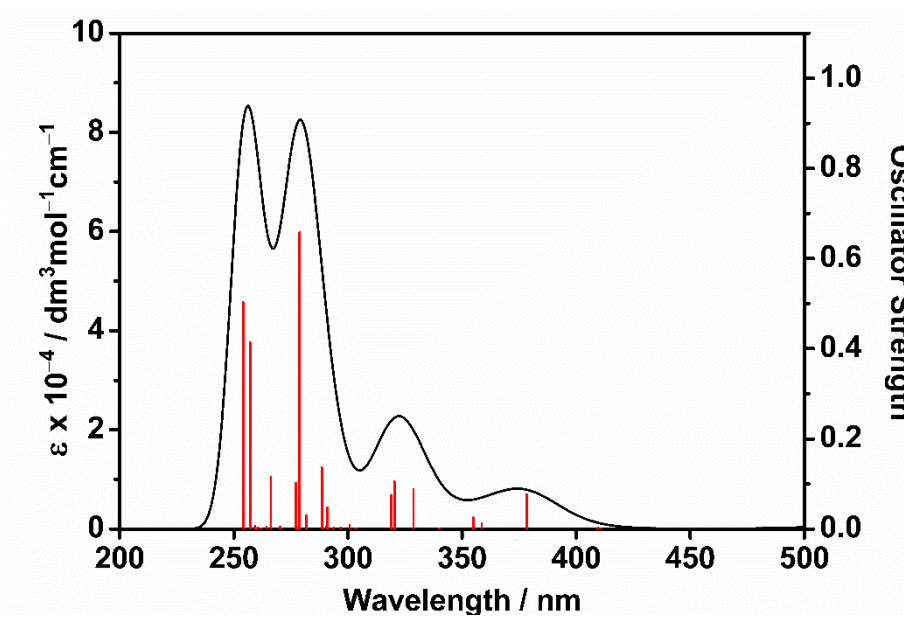

**Figure S8.** Simulated UV-vis spectrum of **1** computed by TDDFT/CPCM using toluene as the solvent.

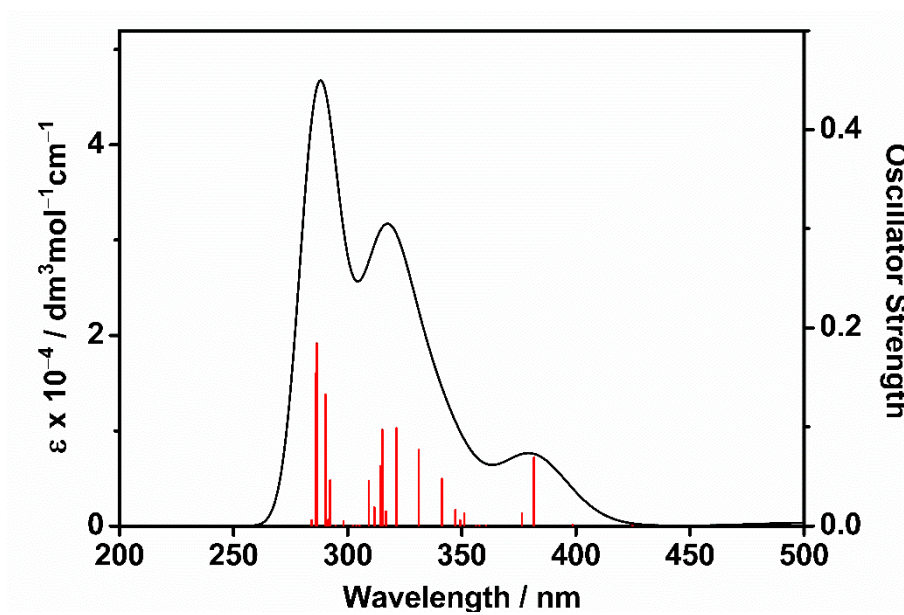

**Figure S9.** Simulated UV-vis spectrum of **2** computed by TDDFT/CPCM using toluene as the solvent.

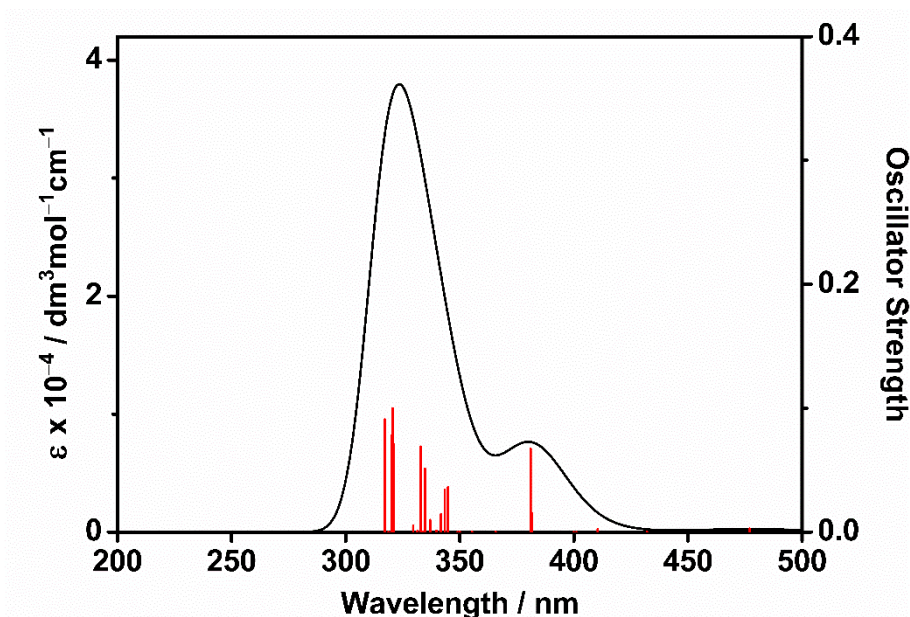

**Figure S10.** Simulated UV-vis spectrum of **3** computed by TDDFT/CPCM using toluene as the solvent.

**Table S3.** Relative energies of the optimized  $T_1$  states of **1–3**.

| Complex  | $\Delta E(T_1-S_0) / \text{cm}^{-1} (\lambda / \text{nm})^a$ |
|----------|--------------------------------------------------------------|
| <b>1</b> | 18868 (530)                                                  |
| <b>2</b> | 18719 (534)                                                  |
| <b>3</b> | 19728 (507)                                                  |

<sup>a</sup> Energy difference between the  $T_1$  and  $S_0$  states at the corresponding optimized geometry in toluene solution.

**Table S4.** Cartesian coordinates of the optimized ground-state geometry of **2**.

|    |    |           |           |           |     |   |           |           |           |
|----|----|-----------|-----------|-----------|-----|---|-----------|-----------|-----------|
| 1  | C  | 3.043353  | -1.076440 | 1.807965  | 64  | C | 12.417765 | -1.044037 | -1.153023 |
| 2  | C  | 1.668215  | -0.895970 | 1.498329  | 65  | H | 12.048345 | -2.015922 | -0.812078 |
| 3  | C  | 0.687324  | -1.371269 | 2.349390  | 66  | H | 12.086366 | -0.901655 | -2.186845 |
| 4  | C  | 1.019872  | -2.050965 | 3.538591  | 67  | H | 13.512793 | -1.082672 | -1.148323 |
| 5  | C  | 2.373754  | -2.220471 | 3.832494  | 68  | C | -0.101424 | -2.573675 | 4.438497  |
| 6  | C  | 3.373321  | -1.741393 | 2.983283  | 69  | C | -0.989644 | -1.399520 | 4.882716  |
| 7  | H  | -0.355339 | -1.221110 | 2.087012  | 70  | H | -0.410032 | -0.662359 | 5.448106  |
| 8  | H  | 2.672251  | -2.736314 | 4.738654  | 71  | H | -1.446474 | -0.887892 | 4.030298  |
| 9  | H  | 4.416449  | -1.894652 | 3.249201  | 72  | H | -1.799115 | -1.762636 | 5.525631  |
| 10 | C  | 3.975137  | -0.520728 | 0.815729  | 73  | C | -0.949960 | -3.586710 | 3.651012  |
| 11 | C  | 5.368995  | -0.503281 | 0.800970  | 74  | H | -1.768453 | -3.959901 | 4.276603  |
| 12 | C  | 3.307390  | 0.083329  | -0.250378 | 75  | H | -1.391123 | -3.142122 | 2.753586  |
| 13 | C  | 6.066850  | 0.103978  | -0.261001 | 76  | H | -0.343628 | -4.443246 | 3.338097  |
| 14 | H  | 5.935437  | -0.935769 | 1.621522  | 77  | C | 0.438393  | -3.268541 | 5.691353  |
| 15 | C  | 3.960271  | 0.694876  | -1.315734 | 78  | H | -0.398714 | -3.622533 | 6.301449  |
| 16 | C  | 5.360878  | 0.699141  | -1.315708 | 79  | H | 1.055307  | -4.138073 | 5.441017  |
| 17 | H  | 5.918863  | 1.138145  | -2.137826 | 80  | H | 1.034408  | -2.588558 | 6.309340  |
| 18 | C  | 7.547108  | 0.113894  | -0.263452 | 81  | H | 0.440727  | 2.606331  | -4.811772 |
| 19 | C  | 8.280174  | -0.995820 | 0.178561  | 82  | H | 2.884439  | 2.892314  | -5.313716 |
| 20 | C  | 8.265266  | 1.228813  | -0.705258 | 83  | H | 4.560383  | 2.014268  | -3.706958 |
| 21 | C  | 9.667849  | -0.982919 | 0.174406  | 84  | C | -5.654012 | -4.056563 | 0.065254  |
| 22 | H  | 7.756150  | -1.889885 | 0.506028  | 85  | C | -4.880126 | -4.576492 | -1.984727 |
| 23 | C  | 9.657633  | 1.235480  | -0.707362 | 86  | C | -5.843358 | -3.510337 | 1.335249  |
| 24 | H  | 7.730445  | 2.118502  | -1.027627 | 87  | C | -6.493489 | -5.080073 | -0.436272 |
| 25 | C  | 10.394485 | 0.131890  | -0.268114 | 88  | C | -4.166886 | -4.625328 | -3.183180 |
| 26 | H  | 10.194812 | -1.869407 | 0.517274  | 89  | C | -5.997218 | -5.413785 | -1.749958 |
| 27 | H  | 10.167456 | 2.129281  | -1.050831 | 90  | C | -6.898624 | -3.999216 | 2.095326  |
| 28 | C  | 3.076361  | 1.264364  | -2.345325 | 91  | H | -5.188262 | -2.732203 | 1.713608  |
| 29 | C  | 3.500398  | 1.903867  | -3.508564 | 92  | C | -7.548451 | -5.552444 | 0.349117  |
| 30 | C  | 0.836899  | 1.593221  | -2.962407 | 93  | C | -4.584167 | -5.538255 | -4.143874 |
| 31 | C  | 2.559235  | 2.393188  | -4.406142 | 94  | H | -3.317872 | -3.971874 | -3.356537 |
| 32 | C  | 1.203269  | 2.238274  | -4.135296 | 95  | C | -6.395144 | -6.323089 | -2.733556 |
| 33 | H  | -0.201703 | 1.438162  | -2.686859 | 96  | C | -7.746602 | -5.007455 | 1.610799  |
| 34 | Au | 1.343725  | 0.082223  | -0.239799 | 97  | H | -7.068918 | -3.590385 | 3.087316  |
| 35 | C  | -1.588950 | -0.946837 | -0.449911 | 98  | H | -8.202089 | -6.337025 | -0.022478 |
| 36 | C  | -1.526981 | 1.235431  | -0.120564 | 99  | C | -5.684499 | -6.381867 | -3.925186 |
| 37 | C  | -1.271706 | -2.298870 | -0.640183 | 100 | H | -4.045979 | -5.597379 | -5.085750 |
| 38 | C  | -2.948525 | -0.525823 | -0.403014 | 101 | H | -7.250571 | -6.972551 | -2.568171 |
| 39 | C  | -1.134419 | 2.563805  | 0.096338  | 102 | H | -8.563412 | -5.363870 | 2.231259  |
| 40 | C  | -2.908530 | 0.896564  | -0.194746 | 103 | H | -5.982148 | -7.084590 | -4.697712 |
| 41 | C  | -2.307882 | -3.209499 | -0.769453 | 104 | C | -5.387936 | 4.586630  | -0.688693 |
| 42 | H  | -0.237145 | -2.629254 | -0.667593 | 105 | C | -4.622722 | 5.049566  | 1.378276  |
| 43 | C  | -3.979649 | -1.453566 | -0.562714 | 106 | C | -5.588392 | 4.057002  | -1.964017 |
| 44 | C  | -2.116630 | 3.534071  | 0.213466  | 107 | C | -6.170116 | 5.660038  | -0.198801 |
| 45 | H  | -0.083537 | 2.832032  | 0.167612  | 108 | C | -3.932365 | 5.047946  | 2.591072  |
| 46 | C  | -3.884832 | 1.883797  | -0.050710 | 109 | C | -5.679430 | 5.956969  | 1.125745  |
| 47 | C  | -3.653831 | -2.793686 | -0.738085 | 110 | C | -6.595718 | 4.614350  | -2.741876 |
| 48 | H  | -2.091869 | -4.266438 | -0.893973 | 111 | H | -4.978846 | 3.238108  | -2.332270 |
| 49 | H  | -5.022159 | -1.147757 | -0.553169 | 112 | C | -7.177619 | 6.201044  | -1.001933 |
| 50 | C  | -3.483577 | 3.200946  | 0.144354  | 113 | C | -4.310382 | 5.981725  | 3.547921  |
| 51 | H  | -1.840369 | 4.573813  | 0.361508  | 114 | H | -3.131175 | 4.340368  | 2.778918  |
| 52 | H  | -4.943343 | 1.640946  | -0.082999 | 115 | C | -6.038791 | 6.885947  | 2.105853  |
| 53 | N  | -0.738786 | 0.120880  | -0.285767 | 116 | C | -7.386262 | 5.673625  | -2.269432 |
| 54 | N  | 1.743196  | 1.126912  | -2.099971 | 117 | H | -6.773788 | 4.219246  | -3.738079 |
| 55 | C  | 11.923902 | 0.102330  | -0.254863 | 118 | H | -7.787030 | 7.024411  | -0.639217 |
| 56 | C  | 12.533412 | 1.410274  | -0.766328 | 119 | C | -5.350117 | 6.894656  | 3.311643  |
| 57 | H  | 12.240623 | 2.265243  | -0.147748 | 120 | H | -3.789263 | 6.002086  | 4.500926  |
| 58 | H  | 13.625505 | 1.340344  | -0.737869 | 121 | H | -6.848046 | 7.588795  | 1.926930  |
| 59 | H  | 12.242357 | 1.617848  | -1.801494 | 122 | H | -8.167004 | 6.083135  | -2.903404 |
| 60 | C  | 12.416068 | -0.129562 | 1.183331  | 123 | H | -5.618308 | 7.611534  | 4.081932  |
| 61 | H  | 12.046088 | -1.074516 | 1.592546  | 124 | N | -4.682945 | -3.760402 | -0.880673 |
| 62 | H  | 13.511060 | -0.161406 | 1.207427  | 125 | N | -4.455827 | 4.226500  | 0.274012  |
| 63 | H  | 12.084056 | 0.676972  | 1.845227  |     |   |           |           |           |

**Table S5.** Cartesian coordinates of the optimized ground-state geometry of **3**.

|    |    |            |           |           |     |   |            |           |           |
|----|----|------------|-----------|-----------|-----|---|------------|-----------|-----------|
| 1  | C  | -6.103700  | -1.068662 | -1.918369 | 64  | C | -15.398129 | -2.034157 | -0.539738 |
| 2  | C  | -4.729900  | -0.875740 | -1.610768 | 65  | H | -15.087374 | -1.593460 | -1.491843 |
| 3  | C  | -3.763218  | -1.015391 | -2.589706 | 66  | H | -14.990883 | -3.049276 | -0.489694 |
| 4  | C  | -4.108801  | -1.357089 | -3.912849 | 67  | H | -16.491481 | -2.105412 | -0.546000 |
| 5  | C  | -5.461228  | -1.543822 | -4.202594 | 68  | C | -3.001869  | -1.511675 | -4.957522 |
| 6  | C  | -6.446785  | -1.402177 | -3.223488 | 69  | C | -2.225020  | -0.189854 | -5.077026 |
| 7  | H  | -2.721033  | -0.863307 | -2.326432 | 70  | H | -2.885089  | 0.624692  | -5.392860 |
| 8  | H  | -5.769788  | -1.806590 | -5.208564 | 71  | H | -1.762675  | 0.099044  | -4.128328 |
| 9  | H  | -7.489153  | -1.556850 | -3.491350 | 72  | H | -1.426210  | -0.288729 | -5.820346 |
| 10 | C  | -7.019416  | -0.884491 | -0.782936 | 73  | C | -2.042386  | -2.629959 | -4.515875 |
| 11 | C  | -8.407976  | -0.991545 | -0.719764 | 74  | H | -1.233975  | -2.743225 | -5.246783 |
| 12 | C  | -6.340191  | -0.559931 | 0.391928  | 75  | H | -1.586993  | -2.418434 | -3.543439 |
| 13 | C  | -9.089436  | -0.771391 | 0.492975  | 76  | H | -2.568194  | -3.587452 | -4.439369 |
| 14 | H  | -8.981158  | -1.268221 | -1.600733 | 77  | C | -3.555544  | -1.870117 | -6.339139 |
| 15 | C  | -6.976209  | -0.336712 | 1.608706  | 78  | H | -2.728438  | -1.967910 | -7.049476 |
| 16 | C  | -8.372026  | -0.443048 | 1.651726  | 79  | H | -4.095057  | -2.823049 | -6.327286 |
| 17 | H  | -8.919301  | -0.250038 | 2.569962  | 80  | H | -4.229797  | -1.096119 | -6.720850 |
| 18 | C  | -10.564477 | -0.884680 | 0.544191  | 81  | H | -3.423233  | 0.820744  | 5.389958  |
| 19 | C  | -11.363931 | -0.421835 | -0.509749 | 82  | H | -5.851485  | 0.755327  | 6.025638  |
| 20 | C  | -11.211160 | -1.455957 | 1.643912  | 83  | H | -7.542578  | 0.219184  | 4.289424  |
| 21 | C  | -12.746601 | -0.527738 | -0.457083 | 84  | C | 2.773428   | -3.840524 | -1.350923 |
| 22 | H  | -10.897769 | 0.050725  | -1.370275 | 85  | C | 2.220053   | -4.853771 | 0.577054  |
| 23 | C  | -12.598916 | -1.558961 | 1.690973  | 86  | C | 2.817757   | -3.014985 | -2.474817 |
| 24 | H  | -10.622043 | -1.852728 | 2.466710  | 87  | C | 3.708621   | -4.886330 | -1.163119 |
| 25 | C  | -13.401913 | -1.098288 | 0.643674  | 88  | C | 1.622756   | -5.219911 | 1.783704  |
| 26 | H  | -13.327234 | -0.146747 | -1.292992 | 89  | C | 3.351915   | -5.538459 | 0.073234  |
| 27 | H  | -13.051606 | -2.018978 | 2.562888  | 90  | C | 3.824879   | -3.237978 | -3.401223 |
| 28 | C  | -6.082255  | -0.001232 | 2.728262  | 91  | H | 2.096529   | -2.216529 | -2.613977 |
| 29 | C  | -6.489196  | 0.255479  | 4.036078  | 92  | C | 4.701095   | -5.109947 | -2.118119 |
| 30 | C  | -3.842672  | 0.328570  | 3.344036  | 93  | C | 2.162567   | -6.295767 | 2.471786  |
| 31 | C  | -5.539581  | 0.554387  | 5.005397  | 94  | H | 0.756343   | -4.689841 | 2.165032  |
| 32 | C  | -4.191944  | 0.592500  | 4.660883  | 95  | C | 3.895639   | -6.603487 | 0.792230  |
| 33 | H  | -2.811333  | 0.341012  | 3.005071  | 96  | C | 4.758672   | -4.277294 | -3.231019 |
| 34 | Au | -4.384306  | -0.401623 | 0.323118  | 97  | H | 3.906797   | -2.600908 | -4.276392 |
| 35 | C  | -1.387381  | -1.227010 | 0.157910  | 98  | H | 5.415470   | -5.920630 | -2.010233 |
| 36 | C  | -1.596741  | 0.957139  | 0.391422  | 99  | C | 3.291432   | -6.982298 | 1.986758  |
| 37 | C  | -1.615300  | -2.602915 | 0.015707  | 100 | H | 1.710905   | -6.626192 | 3.402010  |
| 38 | C  | -0.059719  | -0.710938 | 0.151937  | 101 | H | 4.777990   | -7.129803 | 0.440558  |
| 39 | C  | -2.080154  | 2.265594  | 0.534039  | 102 | C | 2.062786   | 4.361892  | 1.602055  |
| 40 | C  | -0.195408  | 0.711718  | 0.310171  | 103 | C | 1.187151   | 5.215712  | -0.283378 |
| 41 | C  | -0.523584  | -3.441107 | -0.139610 | 104 | C | 2.351225   | 3.577501  | 2.719261  |
| 42 | H  | -2.625740  | -3.001686 | 0.009590  | 105 | C | 2.753825   | 5.571012  | 1.348770  |
| 43 | C  | 1.030344   | -1.572880 | 0.019321  | 106 | C | 0.447270   | 5.437835  | -1.445329 |
| 44 | C  | -1.166626  | 3.303870  | 0.613455  | 107 | C | 2.192367   | 6.118553  | 0.138136  |
| 45 | H  | -3.147162  | 2.465422  | 0.584298  | 108 | C | 3.341312   | 4.020915  | 3.582660  |
| 46 | C  | 0.710119   | 1.772059  | 0.370196  | 109 | H | 1.810186   | 2.657597  | 2.914218  |
| 47 | C  | 0.790505   | -2.933537 | -0.132613 | 110 | C | 3.764982   | 5.987723  | 2.215332  |
| 48 | H  | -0.670431  | -4.508547 | -0.275009 | 111 | C | 0.727043   | 6.579125  | -2.181203 |
| 49 | H  | 2.051425   | -1.201818 | 0.033746  | 112 | H | -0.311129  | 4.734121  | -1.771937 |
| 50 | C  | 0.218337   | 3.062680  | 0.529316  | 113 | C | 2.442568   | 7.274321  | -0.602556 |
| 51 | H  | -1.512067  | 4.325228  | 0.743191  | 114 | C | 4.050697   | 5.210658  | 3.333278  |
| 52 | H  | 1.780990   | 1.607527  | 0.288286  | 115 | H | 3.578219   | 3.449539  | 4.474805  |
| 53 | N  | -2.306098  | -0.216938 | 0.309580  | 116 | H | 4.327287   | 6.897917  | 2.029483  |
| 54 | N  | -4.757349  | 0.044991  | 2.413532  | 117 | C | 1.708887   | 7.496929  | -1.763321 |
| 55 | C  | -14.928560 | -1.193992 | 0.659457  | 118 | H | 0.188978   | 6.774546  | -3.103574 |
| 56 | C  | -15.455028 | -1.847372 | 1.939959  | 119 | H | 3.190761   | 7.995404  | -0.287190 |
| 57 | H  | -15.176177 | -1.277083 | 2.832363  | 120 | N | 1.881083   | -3.830400 | -0.291662 |
| 58 | H  | -16.548218 | -1.892229 | 1.904711  | 121 | N | 1.119145   | 4.158635  | 0.608797  |
| 59 | H  | -15.085846 | -2.871855 | 2.056005  | 122 | C | 5.551705   | -4.738717 | -5.552310 |
| 60 | C  | -15.527306 | 0.218762  | 0.557211  | 123 | C | 7.136862   | -4.417802 | -3.981086 |
| 61 | H  | -15.220645 | 0.725249  | -0.362963 | 124 | C | 4.347393   | -4.906362 | -6.236675 |
| 62 | H  | -16.621731 | 0.166177  | 0.560382  | 125 | C | 6.800963   | -4.859441 | -6.205949 |
| 63 | H  | -15.213695 | 0.838844  | 1.403402  | 126 | C | 7.826822   | -4.156545 | -2.796940 |



|     |   |           |            |           |     |   |           |           |           |
|-----|---|-----------|------------|-----------|-----|---|-----------|-----------|-----------|
| 127 | C | 7.815764  | -4.654230  | -5.199922 | 190 | C | 0.887265  | 11.727302 | -4.078626 |
| 128 | C | 4.413249  | -5.183804  | -7.596667 | 191 | C | 5.445870  | 8.882301  | -3.799026 |
| 129 | H | 3.394075  | -4.825833  | -5.724424 | 192 | H | 4.486760  | 7.373445  | -2.584809 |
| 130 | C | 6.838195  | -5.138713  | -7.574529 | 193 | C | 4.097674  | 10.769913 | -4.507178 |
| 131 | C | 9.215305  | -4.148385  | -2.849520 | 194 | C | -0.447573 | 11.822905 | -3.707887 |
| 132 | H | 7.297980  | -3.964610  | -1.868993 | 195 | H | -2.083806 | 10.931610 | -2.624024 |
| 133 | C | 9.212844  | -4.641283  | -5.224273 | 196 | H | 1.346830  | 12.497692 | -4.691835 |
| 134 | C | 5.642890  | -5.296672  | -8.263421 | 197 | C | 5.312432  | 10.097665 | -4.487939 |
| 135 | H | 3.490256  | -5.318259  | -8.153531 | 198 | H | 6.403578  | 8.369674  | -3.802180 |
| 136 | H | 7.789759  | -5.233789  | -8.090478 | 199 | H | 3.993425  | 11.707380 | -5.046638 |
| 137 | C | 9.905453  | -4.390647  | -4.047208 | 200 | H | -1.040024 | 12.671697 | -4.035977 |
| 138 | H | 9.776821  | -3.948451  | -1.941366 | 201 | H | 6.168069  | 10.512496 | -5.012187 |
| 139 | H | 9.748179  | -4.822048  | -6.152428 | 202 | N | 5.060587  | 5.619275  | 4.239155  |
| 140 | H | 5.657036  | -5.512842  | -9.327446 | 203 | N | 1.952359  | 8.655287  | -2.542103 |
| 141 | H | 10.991220 | -4.378932  | -4.051123 | 204 | N | 3.812093  | -8.072305 | 2.727379  |
| 142 | C | 3.937921  | -9.377989  | 2.270674  | 205 | N | 5.767365  | -4.471206 | -4.206959 |
| 143 | C | 4.274126  | -8.015521  | 4.035553  |     |   |           |           |           |
| 144 | C | 3.585646  | -9.918356  | 1.033551  |     |   |           |           |           |
| 145 | C | 4.489570  | -10.176611 | 3.300381  |     |   |           |           |           |
| 146 | C | 4.365895  | -6.917928  | 4.892152  |     |   |           |           |           |
| 147 | C | 4.704700  | -9.304411  | 4.430401  |     |   |           |           |           |
| 148 | C | 3.807437  | -11.275979 | 0.837650  |     |   |           |           |           |
| 149 | H | 3.152597  | -9.300786  | 0.253362  |     |   |           |           |           |
| 150 | C | 4.703115  | -11.539222 | 3.076172  |     |   |           |           |           |
| 151 | C | 4.884992  | -7.134833  | 6.162728  |     |   |           |           |           |
| 152 | H | 4.046381  | -5.930186  | 4.575972  |     |   |           |           |           |
| 153 | C | 5.222670  | -9.494472  | 5.714130  |     |   |           |           |           |
| 154 | C | 4.362756  | -12.081262 | 1.843945  |     |   |           |           |           |
| 155 | H | 3.543132  | -11.721672 | -0.117088 |     |   |           |           |           |
| 156 | H | 5.127028  | -12.164977 | 3.856845  |     |   |           |           |           |
| 157 | C | 5.307440  | -8.408059  | 6.574868  |     |   |           |           |           |
| 158 | H | 4.967199  | -6.297297  | 6.849648  |     |   |           |           |           |
| 159 | H | 5.557304  | -10.478252 | 6.031822  |     |   |           |           |           |
| 160 | H | 4.524722  | -13.138239 | 1.655215  |     |   |           |           |           |
| 161 | H | 5.707228  | -8.541501  | 7.575588  |     |   |           |           |           |
| 162 | C | 6.190718  | 4.886418   | 4.577131  |     |   |           |           |           |
| 163 | C | 5.081765  | 6.814994   | 4.945716  |     |   |           |           |           |
| 164 | C | 6.608832  | 3.641316   | 4.106130  |     |   |           |           |           |
| 165 | C | 6.953379  | 5.619644   | 5.516813  |     |   |           |           |           |
| 166 | C | 4.151804  | 7.855085   | 4.949952  |     |   |           |           |           |
| 167 | C | 6.243533  | 6.854259   | 5.752684  |     |   |           |           |           |
| 168 | C | 7.802041  | 3.132384   | 4.604248  |     |   |           |           |           |
| 169 | H | 6.024998  | 3.091947   | 3.374696  |     |   |           |           |           |
| 170 | C | 8.149565  | 5.084291   | 6.001446  |     |   |           |           |           |
| 171 | C | 4.411060  | 8.947099   | 5.769170  |     |   |           |           |           |
| 172 | H | 3.257534  | 7.811931   | 4.336738  |     |   |           |           |           |
| 173 | C | 6.480141  | 7.964976   | 6.566772  |     |   |           |           |           |
| 174 | C | 8.566108  | 3.841080   | 5.544112  |     |   |           |           |           |
| 175 | H | 8.150296  | 2.164748   | 4.254331  |     |   |           |           |           |
| 176 | H | 8.745983  | 5.635632   | 6.723275  |     |   |           |           |           |
| 177 | C | 5.562938  | 9.007465   | 6.568504  |     |   |           |           |           |
| 178 | H | 3.703578  | 9.771172   | 5.789912  |     |   |           |           |           |
| 179 | H | 7.368497  | 8.009583   | 7.190910  |     |   |           |           |           |
| 180 | H | 9.493183  | 3.412510   | 5.912776  |     |   |           |           |           |
| 181 | H | 5.735007  | 9.877663   | 7.194769  |     |   |           |           |           |
| 182 | C | 1.017455  | 9.634320   | -2.850947 |     |   |           |           |           |
| 183 | C | 3.163807  | 9.000781   | -3.127474 |     |   |           |           |           |
| 184 | C | -0.320560 | 9.729525   | -2.466878 |     |   |           |           |           |
| 185 | C | 1.633985  | 10.627452  | -3.648489 |     |   |           |           |           |
| 186 | C | 4.379169  | 8.315781   | -3.112087 |     |   |           |           |           |
| 187 | C | 3.008070  | 10.221882  | -3.825296 |     |   |           |           |           |
| 188 | C | -1.039863 | 10.833556  | -2.908058 |     |   |           |           |           |
| 189 | H | -0.781720 | 8.969851   | -1.844054 |     |   |           |           |           |

**Table S6.** Cartesian coordinates of the optimized T<sub>1</sub> geometry of **2** computed by DFT/CPCM.

|    |    |           |           |           |     |   |           |           |           |
|----|----|-----------|-----------|-----------|-----|---|-----------|-----------|-----------|
| 1  | C  | 3.036476  | -0.842263 | 1.891728  | 64  | C | 12.417620 | -1.179309 | -0.975703 |
| 2  | C  | 1.662193  | -0.694483 | 1.553462  | 65  | H | 12.035397 | -2.097596 | -0.519671 |
| 3  | C  | 0.689759  | -1.090509 | 2.460138  | 66  | H | 12.091147 | -1.162093 | -2.020730 |
| 4  | C  | 1.021310  | -1.644361 | 3.713325  | 67  | H | 13.512388 | -1.229101 | -0.960890 |
| 5  | C  | 2.374470  | -1.781487 | 4.023711  | 68  | C | -0.098853 | -2.069659 | 4.666222  |
| 6  | C  | 3.369841  | -1.385438 | 3.126352  | 69  | C | -0.980803 | -0.854075 | 4.996603  |
| 7  | H  | -0.358233 | -0.972053 | 2.197336  | 70  | H | -0.394388 | -0.068032 | 5.483687  |
| 8  | H  | 2.676310  | -2.201832 | 4.977104  | 71  | H | -1.435746 | -0.425753 | 4.098221  |
| 9  | H  | 4.414609  | -1.506633 | 3.403122  | 72  | H | -1.790724 | -1.145636 | 5.675156  |
| 10 | C  | 3.972363  | -0.383459 | 0.854893  | 73  | C | -0.957548 | -3.153071 | 3.992109  |
| 11 | C  | 5.364246  | -0.377866 | 0.858372  | 74  | H | -1.772909 | -3.460612 | 4.657001  |
| 12 | C  | 3.317237  | 0.120175  | -0.270156 | 75  | H | -1.403102 | -2.796531 | 3.058143  |
| 13 | C  | 6.068407  | 0.128662  | -0.262496 | 76  | H | -0.355535 | -4.037906 | 3.760017  |
| 14 | H  | 5.920291  | -0.727148 | 1.723838  | 77  | C | 0.441960  | -2.638191 | 5.981003  |
| 15 | C  | 3.966945  | 0.635480  | -1.408068 | 78  | H | -0.393591 | -2.926222 | 6.627505  |
| 16 | C  | 5.378919  | 0.621772  | -1.370923 | 79  | H | 1.056002  | -3.529788 | 5.816153  |
| 17 | H  | 5.948612  | 0.971260  | -2.228306 | 80  | H | 1.043801  | -1.902187 | 6.524408  |
| 18 | C  | 7.548832  | 0.127029  | -0.257794 | 81  | H | 0.409231  | 2.179028  | -5.020999 |
| 19 | C  | 8.273552  | -0.927052 | 0.317173  | 82  | H | 2.878652  | 2.468852  | -5.568213 |
| 20 | C  | 8.284021  | 1.173950  | -0.823533 | 83  | H | 4.556333  | 1.750725  | -3.887939 |
| 21 | C  | 9.661622  | -0.928663 | 0.318654  | 84  | C | -5.714858 | -3.962699 | 0.112783  |
| 22 | H  | 7.738778  | -1.769607 | 0.747550  | 85  | C | -4.596154 | -4.916923 | -1.614856 |
| 23 | C  | 9.676534  | 1.166192  | -0.822577 | 86  | C | -6.094535 | -3.189902 | 1.209945  |
| 24 | H  | 7.758529  | 2.023421  | -1.251865 | 87  | C | -6.479275 | -5.072530 | -0.309361 |
| 25 | C  | 10.402085 | 0.116655  | -0.251631 | 88  | C | -3.708676 | -5.204753 | -2.651224 |
| 26 | H  | 10.177971 | -1.772898 | 0.768820  | 89  | C | -5.767628 | -5.678834 | -1.412052 |
| 27 | H  | 10.195685 | 2.007787  | -1.269348 | 90  | C | -7.281765 | -3.523170 | 1.853036  |
| 28 | C  | 3.102508  | 1.091197  | -2.456966 | 91  | H | -5.484661 | -2.366972 | 1.566378  |
| 29 | C  | 3.494336  | 1.643181  | -3.685216 | 92  | C | -7.664703 | -5.389544 | 0.353763  |
| 30 | C  | 0.825370  | 1.344200  | -3.111467 | 93  | C | -3.997659 | -6.297146 | -3.461723 |
| 31 | C  | 2.563911  | 2.043474  | -4.621037 | 94  | H | -2.828085 | -4.598696 | -2.833048 |
| 32 | C  | 1.180467  | 1.884619  | -4.317632 | 95  | C | -6.037053 | -6.769313 | -2.239276 |
| 33 | H  | -0.217928 | 1.202932  | -2.843404 | 96  | C | -8.064763 | -4.604736 | 1.428824  |
| 34 | Au | 1.363691  | 0.116849  | -0.290481 | 97  | H | -7.600908 | -2.934204 | 2.707633  |
| 35 | C  | -1.588440 | -0.965227 | -0.407597 | 98  | H | -8.260388 | -6.241520 | 0.039073  |
| 36 | C  | -1.575383 | 1.231039  | -0.226159 | 99  | C | -5.143209 | -7.077621 | -3.257576 |
| 37 | C  | -1.217612 | -2.310996 | -0.517766 | 100 | H | -3.319333 | -6.544375 | -4.272765 |
| 38 | C  | -2.960826 | -0.583668 | -0.376491 | 101 | H | -6.935304 | -7.362266 | -2.093160 |
| 39 | C  | -1.188960 | 2.571692  | -0.107691 | 102 | H | -8.985869 | -4.837701 | 1.953985  |
| 40 | C  | -2.952281 | 0.866444  | -0.264674 | 103 | H | -5.337096 | -7.924863 | -3.908036 |
| 41 | C  | -2.220534 | -3.262822 | -0.602422 | 104 | C | -5.662430 | 4.280265  | -0.756665 |
| 42 | H  | -0.170086 | -2.596103 | -0.513266 | 105 | C | -4.540880 | 5.215492  | 0.979536  |
| 43 | C  | -3.954274 | -1.535642 | -0.468149 | 106 | C | -6.046194 | 3.515411  | -1.857967 |
| 44 | C  | -2.180470 | 3.535404  | -0.024835 | 107 | C | -6.415289 | 5.398129  | -0.334993 |
| 45 | H  | -0.138181 | 2.845389  | -0.100794 | 108 | C | -3.655409 | 5.489290  | 2.021432  |
| 46 | C  | -3.934331 | 1.830277  | -0.175518 | 109 | C | -5.701880 | 5.992325  | 0.773109  |
| 47 | C  | -3.578769 | -2.890555 | -0.582451 | 110 | C | -7.225984 | 3.865177  | -2.505961 |
| 48 | H  | -1.964711 | -4.315443 | -0.651440 | 111 | H | -5.444872 | 2.685955  | -2.213755 |
| 49 | H  | -5.004690 | -1.263994 | -0.488530 | 112 | C | -7.593380 | 5.731708  | -1.003046 |
| 50 | C  | -3.542902 | 3.180149  | -0.054373 | 113 | C | -3.935217 | 6.582718  | 2.833762  |
| 51 | H  | -1.911748 | 4.584469  | 0.030610  | 114 | H | -2.783293 | 4.871932  | 2.206061  |
| 52 | H  | -4.988066 | 1.571380  | -0.160960 | 115 | C | -5.962230 | 7.083553  | 1.602228  |
| 53 | N  | -0.770565 | 0.127750  | -0.315755 | 116 | C | -7.997688 | 4.955097  | -2.082455 |
| 54 | N  | 1.728438  | 0.947372  | -2.176565 | 117 | H | -7.548052 | 3.282695  | -3.363895 |
| 55 | C  | 11.931344 | 0.073645  | -0.228584 | 118 | H | -8.180070 | 6.590044  | -0.688740 |
| 56 | C  | 12.556073 | 1.301838  | -0.895894 | 119 | C | -5.070001 | 7.377840  | 2.626073  |
| 57 | H  | 12.270514 | 2.229634  | -0.388942 | 120 | H | -3.258133 | 6.819152  | 3.649049  |
| 58 | H  | 13.647605 | 1.225188  | -0.856231 | 121 | H | -6.852369 | 7.687914  | 1.453241  |
| 59 | H  | 12.267656 | 1.382852  | -1.949263 | 122 | H | -8.913166 | 5.200997  | -2.611542 |
| 60 | C  | 12.418756 | 0.017073  | 1.228619  | 123 | H | -5.256837 | 8.225484  | 3.278073  |
| 61 | H  | 12.035920 | -0.865260 | 1.750395  | 124 | N | -4.571120 | -3.871272 | -0.685744 |
| 62 | H  | 13.513509 | -0.023484 | 1.261638  | 125 | N | -4.523860 | 4.172472  | 0.047262  |
| 63 | H  | 12.093412 | 0.903041  | 1.783759  |     |   |           |           |           |

**Table S7.** Cartesian coordinates of the optimized T<sub>1</sub> geometry of **3** computed by DFT/CPCM.

|    |    |            |           |           |     |   |            |           |           |
|----|----|------------|-----------|-----------|-----|---|------------|-----------|-----------|
| 1  | C  | -6.134596  | -0.914605 | -2.003807 | 64  | C | -15.453353 | -1.831741 | -0.762089 |
| 2  | C  | -4.761506  | -0.739082 | -1.674142 | 65  | H | -15.119940 | -1.389942 | -1.706021 |
| 3  | C  | -3.800449  | -0.858043 | -2.667535 | 66  | H | -15.059954 | -2.852338 | -0.711298 |
| 4  | C  | -4.141894  | -1.156195 | -4.002290 | 67  | H | -16.547560 | -1.888645 | -0.787595 |
| 5  | C  | -5.493453  | -1.326985 | -4.302748 | 68  | C | -3.033398  | -1.281143 | -5.050769 |
| 6  | C  | -6.477798  | -1.206756 | -3.318128 | 69  | C | -2.253595  | 0.041652  | -5.133209 |
| 7  | H  | -2.753635  | -0.718236 | -2.410621 | 70  | H | -2.913176  | 0.865193  | -5.425891 |
| 8  | H  | -5.802750  | -1.557383 | -5.316650 | 71  | H | -1.794675  | 0.303408  | -4.174814 |
| 9  | H  | -7.521694  | -1.344860 | -3.590042 | 72  | H | -1.452910  | -0.035115 | -5.877807 |
| 10 | C  | -7.058613  | -0.754739 | -0.871569 | 73  | C | -2.073938  | -2.413005 | -4.645931 |
| 11 | C  | -8.446811  | -0.850148 | -0.841161 | 74  | H | -1.266327  | -2.508097 | -5.380964 |
| 12 | C  | -6.394692  | -0.468246 | 0.322692  | 75  | H | -1.617558  | -2.229387 | -3.668138 |
| 13 | C  | -9.138966  | -0.653533 | 0.379893  | 76  | H | -2.602101  | -3.370935 | -4.594850 |
| 14 | H  | -9.007557  | -1.102977 | -1.736623 | 77  | C | -3.584675  | -1.597659 | -6.443706 |
| 15 | C  | -7.032478  | -0.263444 | 1.561076  | 78  | H | -2.757378  | -1.676118 | -7.156771 |
| 16 | C  | -8.441295  | -0.363788 | 1.553100  | 79  | H | -4.127197  | -2.548735 | -6.459538 |
| 17 | H  | -9.004119  | -0.186406 | 2.466058  | 80  | H | -4.258085  | -0.811921 | -6.801849 |
| 18 | C  | -10.615999 | -0.750078 | 0.407254  | 81  | H | -3.450425  | 0.740532  | 5.336421  |
| 19 | C  | -11.396375 | -0.273082 | -0.655908 | 82  | H | -5.909859  | 0.712337  | 5.992812  |
| 20 | C  | -11.292099 | -1.320406 | 1.490857  | 83  | H | -7.598716  | 0.241869  | 4.237661  |
| 21 | C  | -12.781320 | -0.361638 | -0.627340 | 84  | C | 2.855477   | -3.676889 | -1.219677 |
| 22 | H  | -10.909448 | 0.196703  | -1.506392 | 85  | C | 1.894043   | -5.063117 | 0.288311  |
| 23 | C  | -12.681872 | -1.404306 | 1.516109  | 86  | C | 3.131988   | -2.657863 | -2.130766 |
| 24 | H  | -10.720810 | -1.728877 | 2.320322  | 87  | C | 3.711750   | -4.791905 | -1.085384 |
| 25 | C  | -13.462969 | -0.928566 | 0.459004  | 88  | C | 1.084860   | -5.639533 | 1.266890  |
| 26 | H  | -13.342900 | 0.030629  | -1.471551 | 89  | C | 3.097027   | -5.677573 | -0.123333 |
| 27 | H  | -13.153742 | -1.862998 | 2.378874  | 90  | C | 4.304476   | -2.746247 | -2.867522 |
| 28 | C  | -6.161130  | 0.026930  | 2.661921  | 91  | H | 2.461822   | -1.816645 | -2.267907 |
| 29 | C  | -6.541043  | 0.266784  | 3.990280  | 92  | C | 4.870986   | -4.880053 | -1.851486 |
| 30 | C  | -3.883163  | 0.309740  | 3.300833  | 93  | C | 1.475741   | -6.861703 | 1.794492  |
| 31 | C  | -5.604378  | 0.528164  | 4.968195  | 94  | H | 0.173295   | -5.162394 | 1.608561  |
| 32 | C  | -4.226657  | 0.546821  | 4.604179  | 95  | C | 3.488887   | -6.892263 | 0.433429  |
| 33 | H  | -2.844084  | 0.310630  | 2.983696  | 96  | C | 5.172371   | -3.844175 | -2.733723 |
| 34 | Au | -4.446669  | -0.324831 | 0.294908  | 97  | H | 4.564449   | -1.953686 | -3.561640 |
| 35 | C  | -1.425743  | -1.182816 | 0.092554  | 98  | H | 5.525623   | -5.743278 | -1.783883 |
| 36 | C  | -1.594488  | 0.989686  | 0.415512  | 99  | C | 2.665708   | -7.489452 | 1.385892  |
| 37 | C  | -1.700812  | -2.542245 | -0.099001 | 100 | H | 0.851271   | -7.352112 | 2.534132  |
| 38 | C  | -0.084621  | -0.702565 | 0.115861  | 101 | H | 4.424341   | -7.365097 | 0.151039  |
| 39 | C  | -2.075243  | 2.290292  | 0.613117  | 102 | C | 2.283486   | 4.147870  | 1.537667  |
| 40 | C  | -0.195208  | 0.729716  | 0.336953  | 103 | C | 1.054010   | 5.345948  | 0.063786  |
| 41 | C  | -0.633483  | -3.410791 | -0.260879 | 104 | C | 2.756552   | 3.194309  | 2.438842  |
| 42 | H  | -2.726055  | -2.896422 | -0.142395 | 105 | C | 2.945081   | 5.383026  | 1.362469  |
| 43 | C  | 0.973928   | -1.574614 | -0.037274 | 106 | C | 0.122343   | 5.775856  | -0.880577 |
| 44 | C  | -1.155280  | 3.319444  | 0.727041  | 107 | C | 2.162570   | 6.145843  | 0.417062  |
| 45 | H  | -3.141487  | 2.479350  | 0.692974  | 108 | C | 3.919577   | 3.483126  | 3.137830  |
| 46 | C  | 0.715200   | 1.760582  | 0.445425  | 109 | H | 2.225732   | 2.266247  | 2.619606  |
| 47 | C  | 0.693430   | -2.942016 | -0.228377 | 110 | C | 4.121870   | 5.650966  | 2.056935  |
| 48 | H  | -0.816057  | -4.463204 | -0.448873 | 111 | C | 0.304363   | 7.029222  | -1.446578 |
| 49 | H  | 2.003940   | -1.237249 | 0.018788  | 112 | H | -0.707261  | 5.150495  | -1.190545 |
| 50 | C  | 0.227279   | 3.067970  | 0.642654  | 113 | C | 2.320122   | 7.410922  | -0.143539 |
| 51 | H  | -1.496258  | 4.331288  | 0.916945  | 114 | C | 4.609097   | 4.693282  | 2.944382  |
| 52 | H  | 1.782798   | 1.592013  | 0.346800  | 115 | H | 4.301149   | 2.773408  | 3.864639  |
| 53 | N  | -2.318999  | -0.161548 | 0.271793  | 116 | H | 4.659034   | 6.583393  | 1.914561  |
| 54 | N  | -4.793087  | 0.058109  | 2.323004  | 117 | C | 1.384167   | 7.850832  | -1.077246 |
| 55 | C  | -14.991037 | -1.004985 | 0.449090  | 118 | H | -0.389051  | 7.383573  | -2.202323 |
| 56 | C  | -15.546907 | -1.659264 | 1.716731  | 119 | H | 3.150628   | 8.050978  | 0.137217  |
| 57 | H  | -15.274680 | -1.097943 | 2.616811  | 120 | N | 1.754231   | -3.845976 | -0.380456 |
| 58 | H  | -16.640102 | -1.690742 | 1.663966  | 121 | N | 1.135517   | 4.130742  | 0.745804  |
| 59 | H  | -15.191088 | -2.688485 | 1.832647  | 122 | C | 6.422868   | -3.795366 | -4.892868 |
| 60 | C  | -15.571604 | 0.415197  | 0.346094  | 123 | C | 7.642148   | -4.061012 | -3.009066 |
| 61 | H  | -15.241715 | 0.923369  | -0.565106 | 124 | C | 5.392725   | -3.658935 | -5.823722 |
| 62 | H  | -16.666821 | 0.377375  | 0.330166  | 125 | C | 7.775830   | -3.891612 | -5.292852 |
| 63 | H  | -15.263909 | 1.025751  | 1.201375  | 126 | C | 8.072776   | -4.176646 | -1.687230 |

**Table S8.** Cartesian coordinates of the optimized S<sub>1</sub> geometry of **1** computed by TDA-TDDFT/CPCM.

|    |    |            |           |           |    |   |            |           |           |
|----|----|------------|-----------|-----------|----|---|------------|-----------|-----------|
| 1  | C  | -0.318867  | 1.948205  | 0.034197  | 64 | H | -9.894429  | -1.655206 | 0.472564  |
| 2  | C  | 1.016259   | 1.459000  | 0.023030  | 65 | C | -9.746744  | 1.803197  | 0.543949  |
| 3  | C  | 2.073577   | 2.356576  | 0.034317  | 66 | H | -9.294941  | 2.607256  | -0.044866 |
| 4  | C  | 1.864890   | 3.750740  | 0.056638  | 67 | H | -10.833447 | 1.944131  | 0.524189  |
| 5  | C  | 0.547435   | 4.208560  | 0.067298  | 68 | H | -9.407435  | 1.913362  | 1.579178  |
| 6  | C  | -0.531726  | 3.320582  | 0.056140  | 69 | C | -9.881925  | 0.297267  | -1.457167 |
| 7  | H  | 3.091579   | 1.975906  | 0.025528  | 70 | H | -9.435157  | 1.057028  | -2.105617 |
| 8  | H  | 0.339627   | 5.273087  | 0.084635  | 71 | H | -9.640070  | -0.685504 | -1.875022 |
| 9  | H  | -1.545375  | 3.714505  | 0.064806  | 72 | H | -10.969843 | 0.424993  | -1.492874 |
| 10 | C  | -1.349775  | 0.899562  | 0.019198  | 73 | C | 3.072782   | 4.691334  | 0.067625  |
| 11 | C  | -2.737150  | 1.022298  | 0.026044  | 74 | C | 3.927753   | 4.411273  | 1.314777  |
| 12 | C  | -0.805538  | -0.384237 | 0.003542  | 75 | H | 3.350481   | 4.582625  | 2.229350  |
| 13 | C  | -3.542844  | -0.139740 | 0.014242  | 76 | H | 4.290723   | 3.379062  | 1.335099  |
| 14 | H  | -3.209287  | 1.999479  | 0.071333  | 77 | H | 4.800923   | 5.073535  | 1.333443  |
| 15 | C  | -1.558560  | -1.570321 | -0.007906 | 78 | C | 3.919223   | 4.451209  | -1.193593 |
| 16 | C  | -2.959653  | -1.408974 | -0.004805 | 79 | H | 4.792367   | 5.113765  | -1.197177 |
| 17 | H  | -3.606852  | -2.281232 | -0.046357 | 80 | H | 4.281842   | 3.420172  | -1.249144 |
| 18 | C  | -5.018017  | -0.008470 | 0.016851  | 81 | H | 3.335787   | 4.651461  | -2.098334 |
| 19 | C  | -5.658756  | 1.008848  | -0.704598 | 82 | C | 2.660318   | 6.165643  | 0.092568  |
| 20 | C  | -5.829338  | -0.890105 | 0.738032  | 83 | H | 3.555114   | 6.796739  | 0.099850  |
| 21 | C  | -7.041565  | 1.129927  | -0.702229 | 84 | H | 2.070089   | 6.437358  | -0.788892 |
| 22 | H  | -5.063535  | 1.700053  | -1.295406 | 85 | H | 2.075712   | 6.408857  | 0.986020  |
| 23 | C  | -7.216450  | -0.766229 | 0.735050  |    |   |            |           |           |
| 24 | H  | -5.367827  | -1.674065 | 1.332705  |    |   |            |           |           |
| 25 | C  | -7.858943  | 0.246009  | 0.016542  |    |   |            |           |           |
| 26 | H  | -7.492456  | 1.929866  | -1.284173 |    |   |            |           |           |
| 27 | H  | -7.797102  | -1.473509 | 1.318108  |    |   |            |           |           |
| 28 | C  | -0.795977  | -2.790402 | -0.032154 |    |   |            |           |           |
| 29 | C  | -1.304581  | -4.090591 | -0.046951 |    |   |            |           |           |
| 30 | C  | 1.410479   | -3.685877 | -0.058344 |    |   |            |           |           |
| 31 | C  | -0.469851  | -5.192204 | -0.068240 |    |   |            |           |           |
| 32 | H  | -2.382934  | -4.222985 | -0.041156 |    |   |            |           |           |
| 33 | C  | 0.938511   | -4.970464 | -0.073537 |    |   |            |           |           |
| 34 | H  | 2.476317   | -3.482189 | -0.061812 |    |   |            |           |           |
| 35 | H  | -0.875726  | -6.197169 | -0.080032 |    |   |            |           |           |
| 36 | H  | 1.640559   | -5.796410 | -0.089293 |    |   |            |           |           |
| 37 | Au | 1.136954   | -0.573586 | -0.007475 |    |   |            |           |           |
| 38 | C  | 4.077471   | -0.839525 | -1.118711 |    |   |            |           |           |
| 39 | C  | 4.080270   | -0.859100 | 1.086816  |    |   |            |           |           |
| 40 | C  | 3.684501   | -0.787475 | -2.462142 |    |   |            |           |           |
| 41 | C  | 5.446477   | -0.971050 | -0.746841 |    |   |            |           |           |
| 42 | C  | 3.690580   | -0.830626 | 2.431910  |    |   |            |           |           |
| 43 | C  | 5.448295   | -0.984110 | 0.709306  |    |   |            |           |           |
| 44 | C  | 4.679666   | -0.870321 | -3.431737 |    |   |            |           |           |
| 45 | H  | 2.637811   | -0.683866 | -2.728261 |    |   |            |           |           |
| 46 | C  | 6.419810   | -1.051579 | -1.721875 |    |   |            |           |           |
| 47 | C  | 4.688040   | -0.931247 | 3.397444  |    |   |            |           |           |
| 48 | H  | 2.644565   | -0.730954 | 2.702164  |    |   |            |           |           |
| 49 | C  | 6.423959   | -1.082579 | 1.680368  |    |   |            |           |           |
| 50 | C  | 6.022955   | -1.000275 | -3.070421 |    |   |            |           |           |
| 51 | H  | 4.409000   | -0.832886 | -4.481427 |    |   |            |           |           |
| 52 | H  | 7.469953   | -1.151926 | -1.465699 |    |   |            |           |           |
| 53 | C  | 6.030391   | -1.055342 | 3.030577  |    |   |            |           |           |
| 54 | H  | 4.419973   | -0.912309 | 4.448297  |    |   |            |           |           |
| 55 | H  | 7.473432   | -1.178808 | 1.419885  |    |   |            |           |           |
| 56 | H  | 6.779181   | -1.062428 | -3.846262 |    |   |            |           |           |
| 57 | H  | 6.788468   | -1.131688 | 3.803340  |    |   |            |           |           |
| 58 | N  | 3.270701   | -0.774836 | -0.014278 |    |   |            |           |           |
| 59 | N  | 0.602724   | -2.592652 | -0.038914 |    |   |            |           |           |
| 60 | C  | -9.379306  | 0.416249  | -0.008821 |    |   |            |           |           |
| 61 | C  | -10.095189 | -0.641571 | 0.835288  |    |   |            |           |           |
| 62 | H  | -9.800762  | -0.588789 | 1.888786  |    |   |            |           |           |
| 63 | H  | -11.176956 | -0.479986 | 0.785299  |    |   |            |           |           |

**Table S9.** Cartesian coordinates of the optimized S<sub>1</sub> geometry of **2** computed by TDA-TDDFT/CPCM.

|    |    |           |           |           |     |   |           |           |           |
|----|----|-----------|-----------|-----------|-----|---|-----------|-----------|-----------|
| 1  | C  | 3.032711  | 0.725531  | 1.938409  | 64  | C | 12.418939 | -1.509487 | 0.108520  |
| 2  | C  | 1.660714  | 0.596928  | 1.585876  | 65  | H | 12.035842 | -1.866379 | 1.069368  |
| 3  | C  | 0.683196  | 0.938426  | 2.508679  | 66  | H | 12.093220 | -2.212646 | -0.665067 |
| 4  | C  | 1.008468  | 1.414086  | 3.795257  | 67  | H | 13.513659 | -1.535601 | 0.154389  |
| 5  | C  | 2.359811  | 1.530081  | 4.120638  | 68  | C | -0.116161 | 1.781883  | 4.766735  |
| 6  | C  | 3.360322  | 1.190380  | 3.205714  | 69  | C | -0.974858 | 2.900539  | 4.152918  |
| 7  | H  | -0.362756 | 0.837572  | 2.230849  | 70  | H | -0.373235 | 3.797351  | 3.971144  |
| 8  | H  | 2.656725  | 1.890938  | 5.099607  | 71  | H | -1.418824 | 2.595021  | 3.200315  |
| 9  | H  | 4.403510  | 1.295251  | 3.494772  | 72  | H | -1.791620 | 3.169603  | 4.832585  |
| 10 | C  | 3.972503  | 0.337790  | 0.874972  | 73  | C | -0.996780 | 0.547530  | 5.022696  |
| 11 | C  | 5.365432  | 0.342277  | 0.879228  | 74  | H | -1.810532 | 0.797731  | 5.713059  |
| 12 | C  | 3.321787  | -0.076930 | -0.286581 | 75  | H | -1.446151 | 0.170526  | 4.098842  |
| 13 | C  | 6.070032  | -0.068771 | -0.276083 | 76  | H | -0.410671 | -0.263913 | 5.466575  |
| 14 | H  | 5.918954  | 0.686962  | 1.747965  | 77  | C | 0.418259  | 2.274900  | 6.114177  |
| 15 | C  | 3.972242  | -0.493220 | -1.460461 | 78  | H | -0.420352 | 2.524600  | 6.772540  |
| 16 | C  | 5.382182  | -0.479467 | -1.420434 | 79  | H | 1.018561  | 1.509614  | 6.617307  |
| 17 | H  | 5.953768  | -0.818458 | -2.280622 | 80  | H | 1.032132  | 3.174910  | 6.003101  |
| 18 | C  | 7.551163  | -0.067382 | -0.269598 | 81  | H | 0.423149  | -1.831289 | -5.165175 |
| 19 | C  | 8.273783  | -0.439698 | 0.872854  | 82  | H | 2.896428  | -2.045817 | -5.739945 |
| 20 | C  | 8.287207  | 0.305789  | -1.398607 | 83  | H | 4.566859  | -1.419604 | -4.012247 |
| 21 | C  | 9.661915  | -0.439301 | 0.877080  | 84  | C | -5.662418 | -3.968413 | 1.268776  |
| 22 | H  | 7.737486  | -0.757256 | 1.763171  | 85  | C | -4.513126 | -5.373416 | -0.092399 |
| 23 | C  | 9.679837  | 0.301716  | -1.390486 | 86  | C | -6.062647 | -2.912475 | 2.087209  |
| 24 | H  | 7.762721  | 0.628604  | -2.294100 | 87  | C | -6.408367 | -5.164613 | 1.188206  |
| 25 | C  | 10.403658 | -0.069649 | -0.253922 | 88  | C | -3.611899 | -5.940513 | -0.992796 |
| 26 | H  | 10.177178 | -0.744522 | 1.784409  | 89  | C | -5.676969 | -6.058961 | 0.318837  |
| 27 | H  | 10.200230 | 0.607254  | -2.292268 | 90  | C | -7.252901 | -3.058537 | 2.791589  |
| 28 | C  | 3.108485  | -0.887720 | -2.541770 | 91  | H | -5.466095 | -2.012691 | 2.190123  |
| 29 | C  | 3.503820  | -1.343586 | -3.801184 | 92  | C | -7.596868 | -5.289594 | 1.906935  |
| 30 | C  | 0.833219  | -1.126739 | -3.203900 | 93  | C | -3.878604 | -7.227823 | -1.446040 |
| 31 | C  | 2.577711  | -1.692883 | -4.765951 | 94  | H | -2.737947 | -5.401616 | -1.341215 |
| 32 | C  | 1.192993  | -1.575343 | -4.446116 | 95  | C | -5.924227 | -7.348757 | -0.150738 |
| 33 | H  | -0.210782 | -1.023187 | -2.925655 | 96  | C | -8.018194 | -4.228238 | 2.699567  |
| 34 | Au | 1.369396  | -0.089871 | -0.306861 | 97  | H | -7.588131 | -2.248747 | 3.432532  |
| 35 | C  | -1.570005 | -1.191773 | -0.090456 | 98  | H | -8.178692 | -6.205185 | 1.853799  |
| 36 | C  | -3.589845 | 0.955424  | -0.561277 | 99  | C | -5.015868 | -7.930464 | -1.027067 |
| 37 | C  | -1.181946 | -2.508034 | 0.196296  | 100 | H | -3.189131 | -7.692939 | -2.143980 |
| 38 | C  | -2.950024 | -0.840309 | -0.173769 | 101 | H | -6.816396 | -7.885480 | 0.158413  |
| 39 | C  | -1.224974 | 2.280609  | -0.833864 | 102 | H | -8.942097 | -4.309541 | 3.263654  |
| 40 | C  | -2.962651 | 0.577037  | -0.489153 | 103 | H | -5.192286 | -8.934806 | -1.399297 |
| 41 | C  | -2.169754 | -3.457501 | 0.390652  | 104 | C | -5.722166 | 3.669368  | -1.930670 |
| 42 | H  | -0.132144 | -2.768613 | 0.282644  | 105 | C | -4.616521 | 5.074563  | -0.534867 |
| 43 | C  | -3.929028 | -1.793071 | 0.015576  | 106 | C | -6.093119 | 2.617516  | -2.767973 |
| 44 | C  | -2.230145 | 3.212404  | -1.028776 | 107 | C | -6.492992 | 4.849098  | -1.839810 |
| 45 | H  | -0.179688 | 2.562923  | -0.905185 | 108 | C | -3.736473 | 5.644500  | 0.384559  |
| 46 | C  | -3.959052 | 1.511988  | -0.679488 | 109 | C | -5.789277 | 5.743681  | -0.948281 |
| 47 | C  | -3.533852 | -3.116646 | 0.300819  | 110 | C | -7.278660 | 2.750432  | -3.482713 |
| 48 | H  | -1.898494 | -4.474630 | 0.650200  | 111 | H | -5.477919 | 1.730981  | -2.876437 |
| 49 | H  | -4.982841 | -1.555120 | -0.085801 | 112 | C | -7.676361 | 4.960980  | -2.569345 |
| 50 | C  | -3.587476 | 2.844500  | -0.952010 | 113 | C | -4.033748 | 6.918628  | 0.855556  |
| 51 | H  | -1.977034 | 4.237435  | -1.275477 | 114 | H | -2.855853 | 5.116941  | 0.733952  |
| 52 | H  | -5.008829 | 1.253219  | -0.587094 | 115 | C | -6.067017 | 7.020694  | -0.460715 |
| 53 | N  | -0.770204 | -0.111229 | -0.324240 | 116 | C | -8.067966 | 3.903490  | -3.382014 |
| 54 | N  | 1.731388  | -0.781863 | -2.244629 | 117 | H | -7.591324 | 1.943605  | -4.138645 |
| 55 | C  | 11.932917 | -0.084868 | -0.205684 | 118 | H | -8.277196 | 5.863763  | -2.508684 |
| 56 | C  | 12.559106 | 0.353281  | -1.532302 | 119 | C | -5.180133 | 7.605643  | 0.435096  |
| 57 | H  | 12.272710 | 1.376112  | -1.799021 | 120 | H | -3.361419 | 7.385809  | 1.568735  |
| 58 | H  | 13.650535 | 0.325864  | -1.449315 | 121 | H | -6.966130 | 7.544876  | -0.771338 |
| 59 | H  | 12.272634 | -0.309685 | -2.355545 | 122 | H | -8.987399 | 3.974771  | -3.954710 |
| 60 | C  | 12.418883 | 0.871922  | 0.895462  | 123 | H | -5.380455 | 8.600137  | 0.821448  |
| 61 | H  | 12.036177 | 0.585538  | 1.879776  | 124 | N | -4.511203 | -4.099613 | 0.486397  |
| 62 | H  | 13.513612 | 0.866023  | 0.947620  | 125 | N | -4.582549 | 3.811213  | -1.134256 |
| 63 | H  | 12.092679 | 1.897493  | 0.693551  |     |   |           |           |           |

**Table S10.** Cartesian coordinates of the optimized S<sub>1</sub> geometry of **3** computed by TDA-TDDFT/CPCM.

|    |    |            |           |           |     |   |            |           |           |
|----|----|------------|-----------|-----------|-----|---|------------|-----------|-----------|
| 1  | C  | -6.191457  | -0.370513 | -2.051922 | 64  | C | -15.459876 | -1.793108 | -0.892225 |
| 2  | C  | -4.811393  | -0.280672 | -1.719225 | 65  | H | -15.163880 | -1.071316 | -1.659497 |
| 3  | C  | -3.876632  | -0.090027 | -2.726169 | 66  | H | -15.055274 | -2.770189 | -1.176089 |
| 4  | C  | -4.253470  | 0.017922  | -4.080293 | 67  | H | -16.553700 | -1.860998 | -0.901315 |
| 5  | C  | -5.611894  | -0.072499 | -4.383790 | 68  | C | -3.174819  | 0.226344  | -5.146587 |
| 6  | C  | -6.569824  | -0.263981 | -3.384198 | 69  | C | -2.413127  | 1.530204  | -4.855815 |
| 7  | H  | -2.824176  | -0.022768 | -2.462649 | 70  | H | -3.090345  | 2.390377  | -4.879349 |
| 8  | H  | -5.947957  | 0.004982  | -5.412280 | 71  | H | -1.931784  | 1.508323  | -3.873172 |
| 9  | H  | -7.619913  | -0.329799 | -3.659419 | 72  | H | -1.632132  | 1.690352  | -5.608011 |
| 10 | C  | -7.082713  | -0.572471 | -0.898942 | 73  | C | -2.190634  | -0.954866 | -5.115715 |
| 11 | C  | -8.469046  | -0.701855 | -0.862909 | 74  | H | -1.406475  | -0.816390 | -5.868969 |
| 12 | C  | -6.386320  | -0.644583 | 0.307249  | 75  | H | -1.704329  | -1.052590 | -4.140139 |
| 13 | C  | -9.121767  | -0.897153 | 0.376508  | 76  | H | -2.706107  | -1.896936 | -5.329753 |
| 14 | H  | -9.054433  | -0.685243 | -1.777747 | 77  | C | -3.762917  | 0.321272  | -6.557048 |
| 15 | C  | -6.984184  | -0.837386 | 1.564103  | 78  | H | -2.955829  | 0.469283  | -7.282111 |
| 16 | C  | -8.389366  | -0.960688 | 1.564232  | 79  | H | -4.296607  | -0.593061 | -6.836870 |
| 17 | H  | -8.924762  | -1.079343 | 2.502762  | 80  | H | -4.453886  | 1.165373  | -6.653002 |
| 18 | C  | -10.596523 | -1.029464 | 0.414883  | 81  | H | -3.297586  | -0.907742 | 5.374072  |
| 19 | C  | -11.417550 | -0.263744 | -0.425034 | 82  | H | -5.734030  | -1.207987 | 6.056558  |
| 20 | C  | -11.227982 | -1.921378 | 1.287390  | 83  | H | -7.468588  | -1.177363 | 4.279570  |
| 21 | C  | -12.799688 | -0.386735 | -0.385637 | 84  | C | 2.920139   | -3.642401 | -1.337193 |
| 22 | H  | -10.964817 | 0.456294  | -1.101594 | 85  | C | 1.987257   | -5.082942 | 0.136640  |
| 23 | C  | -12.615112 | -2.039449 | 1.325038  | 86  | C | 3.175837   | -2.595797 | -2.222787 |
| 24 | H  | -10.623753 | -2.552857 | 1.933432  | 87  | C | 3.798754   | -4.742883 | -1.229922 |
| 25 | C  | -13.437022 | -1.276809 | 0.490512  | 88  | C | 1.189513   | -5.698927 | 1.100441  |
| 26 | H  | -13.394327 | 0.235468  | -1.049881 | 89  | C | 3.202052   | -5.663496 | -0.289549 |
| 27 | H  | -13.051964 | -2.752560 | 2.016389  | 90  | C | 4.349751   | -2.642236 | -2.960972 |
| 28 | C  | -6.079686  | -0.871708 | 2.682878  | 91  | H | 2.488686   | -1.765195 | -2.338933 |
| 29 | C  | -6.419971  | -1.050558 | 4.025420  | 92  | C | 4.959482   | -4.788615 | -1.997440 |
| 30 | C  | -3.787981  | -0.727424 | 3.315372  | 93  | C | 1.604792   | -6.925386 | 1.598570  |
| 31 | C  | -5.457995  | -1.068674 | 5.017745  | 94  | H | 0.268521   | -5.248419 | 1.452789  |
| 32 | C  | -4.093668  | -0.900634 | 4.638277  | 95  | C | 3.618140   | -6.883104 | 0.237998  |
| 33 | H  | -2.760953  | -0.597095 | 2.989108  | 96  | C | 5.239698   | -3.725327 | -2.853700 |
| 34 | Au | -4.442835  | -0.460554 | 0.273381  | 97  | H | 4.593643   | -1.827833 | -3.635345 |
| 35 | C  | -1.403500  | -1.255395 | 0.035843  | 98  | H | 5.631627   | -5.639654 | -1.950758 |
| 36 | C  | -1.609619  | 0.899106  | 0.416888  | 99  | C | 2.807125   | -7.519119 | 1.175670  |
| 37 | C  | -1.653560  | -2.614818 | -0.191230 | 100 | H | 0.990284   | -7.445873 | 2.325847  |
| 38 | C  | -0.069142  | -0.755493 | 0.076655  | 101 | H | 4.562824   | -7.330266 | -0.055209 |
| 39 | C  | -2.110972  | 2.188578  | 0.645784  | 102 | C | 2.212804   | 4.086665  | 1.644551  |
| 40 | C  | -0.203836  | 0.666019  | 0.336443  | 103 | C | 0.968410   | 5.309693  | 0.203900  |
| 41 | C  | -0.572278  | -3.460915 | -0.373157 | 104 | C | 2.697502   | 3.113966  | 2.518655  |
| 42 | H  | -2.671161  | -2.988119 | -0.243185 | 105 | C | 2.854666   | 5.337083  | 1.510089  |
| 43 | C  | 1.004017   | -1.606441 | -0.097919 | 106 | C | 0.033821   | 5.752607  | -0.731472 |
| 44 | C  | -1.209697  | 3.228397  | 0.790765  | 107 | C | 2.062653   | 6.116049  | 0.585486  |
| 45 | H  | -3.179551  | 2.360090  | 0.724186  | 108 | C | 3.853526   | 3.399628  | 3.230322  |
| 46 | C  | 0.688500   | 1.708675  | 0.479327  | 109 | H | 2.180228   | 2.173135  | 2.670059  |
| 47 | C  | 0.746598   | -2.971810 | -0.326551 | 110 | C | 4.024024   | 5.602904  | 2.217108  |
| 48 | H  | -0.737222  | -4.511092 | -0.587656 | 111 | C | 0.197438   | 7.025385  | -1.258399 |
| 49 | H  | 2.028308   | -1.253891 | -0.031367 | 112 | H | -0.783515  | 5.123184  | -1.064758 |
| 50 | C  | 0.178084   | 3.001782  | 0.709475  | 113 | C | 2.202246   | 7.399432  | 0.063958  |
| 51 | H  | -1.568113  | 4.229195  | 1.004803  | 114 | C | 4.524089   | 4.626016  | 3.076629  |
| 52 | H  | 1.759177   | 1.560687  | 0.381863  | 115 | H | 4.243360   | 2.674503  | 3.937166  |
| 53 | N  | -2.312858  | -0.255530 | 0.240188  | 116 | H | 4.546229   | 6.547870  | 2.105550  |
| 54 | N  | -4.722199  | -0.704986 | 2.329011  | 117 | C | 1.262392   | 7.852654  | -0.859925 |
| 55 | C  | -14.963705 | -1.378388 | 0.502685  | 118 | H | -0.498365  | 7.390737  | -2.006575 |
| 56 | C  | -15.468090 | -2.408496 | 1.516819  | 119 | H | 3.021505   | 8.043630  | 0.367137  |
| 57 | H  | -15.171183 | -2.151727 | 2.539181  | 120 | N | 1.823241   | -3.853456 | -0.502463 |
| 58 | H  | -16.562036 | -2.445054 | 1.489020  | 121 | N | 1.067725   | 4.075408  | 0.848369  |
| 59 | H  | -15.097099 | -3.414374 | 1.293405  | 122 | C | 6.489859   | -3.596752 | -5.009825 |
| 60 | C  | -15.561979 | -0.009852 | 0.868523  | 123 | C | 7.713585   | -3.883050 | -3.131948 |
| 61 | H  | -15.269259 | 0.765074  | 0.153557  | 124 | C | 5.457453   | -3.459490 | -5.938038 |
| 62 | H  | -16.656641 | -0.063384 | 0.874442  | 125 | C | 7.844818   | -3.653234 | -5.410599 |
| 63 | H  | -15.230791 | 0.307901  | 1.862661  | 126 | C | 8.145873   | -4.022649 | -1.812971 |

|     |   |           |            |           |     |   |           |           |           |
|-----|---|-----------|------------|-----------|-----|---|-----------|-----------|-----------|
| 127 | C | 8.626847  | -3.835435  | -4.210564 | 190 | C | 0.085883  | 12.413935 | -2.167401 |
| 128 | C | 5.806970  | -3.358085  | -7.279425 | 191 | C | 4.688738  | 9.766539  | -3.014471 |
| 129 | H | 4.417768  | -3.438906  | -5.628244 | 192 | H | 3.920461  | 8.004689  | -2.031204 |
| 130 | C | 8.168905  | -3.548733  | -6.765341 | 193 | C | 3.227749  | 11.696377 | -3.155677 |
| 131 | C | 9.513570  | -4.133306  | -1.591867 | 194 | C | -1.194191 | 12.382116 | -1.630020 |
| 132 | H | 7.442713  | -4.040362  | -0.986780 | 195 | H | -2.667925 | 11.232667 | -0.556868 |
| 133 | C | 9.996506  | -3.949068  | -3.960845 | 196 | H | 0.455372  | 13.307535 | -2.662714 |
| 134 | C | 7.146756  | -3.397262  | -7.693008 | 197 | C | 4.447437  | 11.087375 | -3.420043 |
| 135 | H | 5.021968  | -3.249443  | -8.022207 | 198 | H | 5.645871  | 9.305189  | -3.239792 |
| 136 | H | 9.205784  | -3.590117  | -7.087177 | 199 | H | 3.037183  | 12.715743 | -3.479599 |
| 137 | C | 10.432439 | -4.101372  | -2.651242 | 200 | H | -1.835348 | 13.254705 | -1.709293 |
| 138 | H | 9.875998  | -4.245134  | -0.574067 | 201 | H | 5.221213  | 11.634708 | -3.949655 |
| 139 | H | 10.709155 | -3.914993  | -4.780207 | 202 | N | 5.702571  | 4.870856  | 3.813384  |
| 140 | H | 7.383652  | -3.313563  | -8.749268 | 203 | N | 1.384335  | 9.144914  | -1.414243 |
| 141 | H | 11.493916 | -4.192996  | -2.442231 | 204 | N | 3.195590  | -8.765916 | 1.712507  |
| 142 | C | 3.507644  | -9.905075  | 0.976504  | 205 | N | 6.421167  | -3.735929 | -3.626867 |
| 143 | C | 3.334817  | -9.060890  | 3.065304  |     |   |           |           |           |
| 144 | C | 3.481542  | -10.100949 | -0.404391 |     |   |           |           |           |
| 145 | C | 3.850494  | -10.948252 | 1.867528  |     |   |           |           |           |
| 146 | C | 3.165026  | -8.231352  | 4.173980  |     |   |           |           |           |
| 147 | C | 3.741168  | -10.408453 | 3.202361  |     |   |           |           |           |
| 148 | C | 3.824239  | -11.360102 | -0.882620 |     |   |           |           |           |
| 149 | H | 3.198814  | -9.302897  | -1.083013 |     |   |           |           |           |
| 150 | C | 4.191169  | -12.204556 | 1.360593  |     |   |           |           |           |
| 151 | C | 3.390370  | -8.781500  | 5.430276  |     |   |           |           |           |
| 152 | H | 2.872844  | -7.192295  | 4.062945  |     |   |           |           |           |
| 153 | C | 3.961136  | -10.936601 | 4.476706  |     |   |           |           |           |
| 154 | C | 4.179808  | -12.402430 | -0.013825 |     |   |           |           |           |
| 155 | H | 3.812917  | -11.538466 | -1.953970 |     |   |           |           |           |
| 156 | H | 4.456834  | -13.015188 | 2.033425  |     |   |           |           |           |
| 157 | C | 3.780388  | -10.119951 | 5.585197  |     |   |           |           |           |
| 158 | H | 3.263315  | -8.157251  | 6.310004  |     |   |           |           |           |
| 159 | H | 4.273239  | -11.970302 | 4.596909  |     |   |           |           |           |
| 160 | H | 4.443754  | -13.373207 | -0.422163 |     |   |           |           |           |
| 161 | H | 3.946122  | -10.517381 | 6.581892  |     |   |           |           |           |
| 162 | C | 6.835257  | 4.062192   | 3.824492  |     |   |           |           |           |
| 163 | C | 5.928690  | 5.961355   | 4.648917  |     |   |           |           |           |
| 164 | C | 7.089298  | 2.885206   | 3.120103  |     |   |           |           |           |
| 165 | C | 7.803652  | 4.639550   | 4.677873  |     |   |           |           |           |
| 166 | C | 5.075981  | 7.014216   | 4.980875  |     |   |           |           |           |
| 167 | C | 7.224027  | 5.852472   | 5.205297  |     |   |           |           |           |
| 168 | C | 8.327908  | 2.281037   | 3.300943  |     |   |           |           |           |
| 169 | H | 6.351086  | 2.457225   | 2.449897  |     |   |           |           |           |
| 170 | C | 9.040736  | 4.012225   | 4.841906  |     |   |           |           |           |
| 171 | C | 5.551704  | 7.972873   | 5.867699  |     |   |           |           |           |
| 172 | H | 4.074419  | 7.082382   | 4.569224  |     |   |           |           |           |
| 173 | C | 7.677960  | 6.829680   | 6.094137  |     |   |           |           |           |
| 174 | C | 9.294589  | 2.832457   | 4.154628  |     |   |           |           |           |
| 175 | H | 8.550450  | 1.362950   | 2.764901  |     |   |           |           |           |
| 176 | H | 9.793983  | 4.444685   | 5.494538  |     |   |           |           |           |
| 177 | C | 6.839372  | 7.888279   | 6.417351  |     |   |           |           |           |
| 178 | H | 4.907858  | 8.803662   | 6.141409  |     |   |           |           |           |
| 179 | H | 8.671187  | 6.758666   | 6.528645  |     |   |           |           |           |
| 180 | H | 10.251306 | 2.333105   | 4.273473  |     |   |           |           |           |
| 181 | H | 7.179221  | 8.656187   | 7.105526  |     |   |           |           |           |
| 182 | C | 0.397579  | 10.126630  | -1.410261 |     |   |           |           |           |
| 183 | C | 2.510698  | 9.651804   | -2.056344 |     |   |           |           |           |
| 184 | C | -0.881935 | 10.093142  | -0.855490 |     |   |           |           |           |
| 185 | C | 0.895363  | 11.280921  | -2.057654 |     |   |           |           |           |
| 186 | C | 3.728379  | 9.029393   | -2.331739 |     |   |           |           |           |
| 187 | C | 2.245156  | 10.977301  | -2.471194 |     |   |           |           |           |
| 188 | C | -1.666983 | 11.233441  | -0.978536 |     |   |           |           |           |
| 189 | H | -1.252471 | 9.212516   | -0.341219 |     |   |           |           |           |

**Table S11.** Cartesian coordinates of the optimized T<sub>1</sub> geometry of **1** computed by TDA-TDDFT/CPCM.

|    |    |            |           |           |    |   |            |           |           |
|----|----|------------|-----------|-----------|----|---|------------|-----------|-----------|
| 1  | C  | -0.318442  | 1.947748  | 0.032574  | 64 | H | -9.894540  | -1.653493 | 0.473562  |
| 2  | C  | 1.016609   | 1.458488  | 0.021548  | 65 | C | -9.746078  | 1.804918  | 0.542884  |
| 3  | C  | 2.074071   | 2.355964  | 0.031741  | 66 | H | -9.294172  | 2.608536  | -0.046453 |
| 4  | C  | 1.865461   | 3.750141  | 0.052877  | 67 | H | -10.832754 | 1.946055  | 0.523132  |
| 5  | C  | 0.548040   | 4.208082  | 0.063424  | 68 | H | -9.406661  | 1.915643  | 1.578017  |
| 6  | C  | -0.531160  | 3.320183  | 0.053304  | 69 | C | -9.881685  | 0.297813  | -1.457329 |
| 7  | H  | 3.092054   | 1.975309  | 0.023020  | 70 | H | -9.434776  | 1.057082  | -2.106257 |
| 8  | H  | 0.340314   | 5.272637  | 0.079850  | 71 | H | -9.640071  | -0.685265 | -1.874600 |
| 9  | H  | -1.544787  | 3.714161  | 0.061801  | 72 | H | -10.969574 | 0.425762  | -1.493060 |
| 10 | C  | -1.349388  | 0.899219  | 0.018688  | 73 | C | 3.073458   | 4.690624  | 0.062732  |
| 11 | C  | -2.736676  | 1.022196  | 0.025297  | 74 | C | 3.928725   | 4.411544  | 1.309898  |
| 12 | C  | -0.805115  | -0.384675 | 0.004380  | 75 | H | 3.351729   | 4.583798  | 2.224477  |
| 13 | C  | -3.542642  | -0.139634 | 0.014274  | 76 | H | 4.291561   | 3.379302  | 1.331049  |
| 14 | H  | -3.208625  | 1.999512  | 0.069779  | 77 | H | 4.801992   | 5.073700  | 1.327731  |
| 15 | C  | -1.558580  | -1.570432 | -0.006420 | 78 | C | 3.919538   | 4.449337  | -1.198508 |
| 16 | C  | -2.959598  | -1.408947 | -0.003811 | 79 | H | 4.792697   | 5.111866  | -1.202912 |
| 17 | H  | -3.606887  | -2.281152 | -0.045027 | 80 | H | 4.282122   | 3.418245  | -1.253242 |
| 18 | C  | -5.017781  | -0.008085 | 0.016709  | 81 | H | 3.335862   | 4.648803  | -2.103265 |
| 19 | C  | -5.658317  | 1.008903  | -0.705384 | 82 | C | 2.661139   | 6.164995  | 0.086515  |
| 20 | C  | -5.829269  | -0.889107 | 0.738454  | 83 | H | 3.556003   | 6.796002  | 0.093010  |
| 21 | C  | -7.041099  | 1.130279  | -0.703052 | 84 | H | 2.070708   | 6.436012  | -0.795024 |
| 22 | H  | -5.062972  | 1.699611  | -1.296650 | 85 | H | 2.076802   | 6.409046  | 0.979915  |
| 23 | C  | -7.216352  | -0.764935 | 0.735429  |    |   |            |           |           |
| 24 | H  | -5.367910  | -1.672781 | 1.333622  |    |   |            |           |           |
| 25 | C  | -7.858643  | 0.246996  | 0.016310  |    |   |            |           |           |
| 26 | H  | -7.491835  | 1.929943  | -1.285492 |    |   |            |           |           |
| 27 | H  | -7.797142  | -1.471715 | 1.318956  |    |   |            |           |           |
| 28 | C  | -0.796305  | -2.790832 | -0.029389 |    |   |            |           |           |
| 29 | C  | -1.305292  | -4.090752 | -0.041727 |    |   |            |           |           |
| 30 | C  | 1.409948   | -3.686998 | -0.054541 |    |   |            |           |           |
| 31 | C  | -0.470929  | -5.192809 | -0.061333 |    |   |            |           |           |
| 32 | H  | -2.383693  | -4.222718 | -0.035199 |    |   |            |           |           |
| 33 | C  | 0.937360   | -4.971318 | -0.067355 |    |   |            |           |           |
| 34 | H  | 2.475823   | -3.483734 | -0.058653 |    |   |            |           |           |
| 35 | H  | -0.877073  | -6.197673 | -0.071096 |    |   |            |           |           |
| 36 | H  | 1.639190   | -5.797498 | -0.081909 |    |   |            |           |           |
| 37 | Au | 1.137562   | -0.574191 | -0.006851 |    |   |            |           |           |
| 38 | C  | 4.075612   | -0.845132 | -1.118182 |    |   |            |           |           |
| 39 | C  | 4.079683   | -0.854770 | 1.087686  |    |   |            |           |           |
| 40 | C  | 3.681885   | -0.799680 | -2.461539 |    |   |            |           |           |
| 41 | C  | 5.444851   | -0.973073 | -0.746388 |    |   |            |           |           |
| 42 | C  | 3.690860   | -0.820788 | 2.432800  |    |   |            |           |           |
| 43 | C  | 5.447518   | -0.979461 | 0.709825  |    |   |            |           |           |
| 44 | C  | 4.676661   | -0.885673 | -3.431272 |    |   |            |           |           |
| 45 | H  | 2.634863   | -0.698637 | -2.727461 |    |   |            |           |           |
| 46 | C  | 6.417847   | -1.056930 | -1.721552 |    |   |            |           |           |
| 47 | C  | 4.689146   | -0.915317 | 3.398127  |    |   |            |           |           |
| 48 | H  | 2.644826   | -0.721629 | 2.703299  |    |   |            |           |           |
| 49 | C  | 6.424068   | -1.071961 | 1.680663  |    |   |            |           |           |
| 50 | C  | 6.020295   | -1.012315 | -3.070050 |    |   |            |           |           |
| 51 | H  | 4.405414   | -0.853348 | -4.480984 |    |   |            |           |           |
| 52 | H  | 7.468228   | -1.154829 | -1.465399 |    |   |            |           |           |
| 53 | C  | 6.031440   | -1.039029 | 3.030934  |    |   |            |           |           |
| 54 | H  | 4.421734   | -0.891941 | 4.449060  |    |   |            |           |           |
| 55 | H  | 7.473491   | -1.167785 | 1.419827  |    |   |            |           |           |
| 56 | H  | 6.776206   | -1.077093 | -3.845988 |    |   |            |           |           |
| 57 | H  | 6.790154   | -1.110619 | 3.803532  |    |   |            |           |           |
| 58 | N  | 3.269133   | -0.776766 | -0.013459 |    |   |            |           |           |
| 59 | N  | 0.602340   | -2.593291 | -0.037090 |    |   |            |           |           |
| 60 | C  | -9.378968  | 0.417560  | -0.009078 |    |   |            |           |           |
| 61 | C  | -10.095028 | -0.639598 | 0.835709  |    |   |            |           |           |
| 62 | H  | -9.800499  | -0.586268 | 1.889151  |    |   |            |           |           |
| 63 | H  | -11.176760 | -0.477786 | 0.785714  |    |   |            |           |           |



**Table S12.** Cartesian coordinates of the optimized T<sub>1</sub> geometry of **2** computed by TDA-TDDFT/CPCM.

|    |    |           |           |           |     |   |           |           |           |
|----|----|-----------|-----------|-----------|-----|---|-----------|-----------|-----------|
| 1  | C  | 3.024058  | 1.069336  | 1.763751  | 64  | C | 12.416665 | -1.460544 | 0.432794  |
| 2  | C  | 1.653789  | 0.870199  | 1.438748  | 65  | H | 12.028057 | -1.630220 | 1.441533  |
| 3  | C  | 0.672653  | 1.369666  | 2.282392  | 66  | H | 12.094164 | -2.296558 | -0.196508 |
| 4  | C  | 0.992121  | 2.079824  | 3.457382  | 67  | H | 13.511086 | -1.477870 | 0.488779  |
| 5  | C  | 2.341962  | 2.262800  | 3.757142  | 68  | C | -0.137262 | 2.617513  | 4.340111  |
| 6  | C  | 3.346207  | 1.763546  | 2.923070  | 69  | C | -0.999447 | 3.596604  | 3.524905  |
| 7  | H  | -0.372245 | 1.211437  | 2.029288  | 70  | H | -0.401015 | 4.446343  | 3.179497  |
| 8  | H  | 2.634636  | 2.802361  | 4.651582  | 71  | H | -1.438899 | 3.115158  | 2.645528  |
| 9  | H  | 4.388182  | 1.925829  | 3.189021  | 72  | H | -1.819624 | 3.984306  | 4.140088  |
| 10 | C  | 3.968677  | 0.494807  | 0.793392  | 73  | C | -1.013084 | 1.449104  | 4.821999  |
| 11 | C  | 5.361459  | 0.501667  | 0.803320  | 74  | H | -1.830127 | 1.820769  | 5.451049  |
| 12 | C  | 3.323352  | -0.128606 | -0.274229 | 75  | H | -1.457892 | 0.902549  | 3.984770  |
| 13 | C  | 6.071910  | -0.116589 | -0.251705 | 76  | H | -0.424646 | 0.738826  | 5.412080  |
| 14 | H  | 5.910626  | 1.001760  | 1.595903  | 77  | C | 0.390917  | 3.358190  | 5.571654  |
| 15 | C  | 3.979969  | -0.754575 | -1.347210 | 78  | H | -0.450624 | 3.723214  | 6.169643  |
| 16 | C  | 5.389661  | -0.733113 | -1.303196 | 79  | H | 0.993248  | 2.704266  | 6.210973  |
| 17 | H  | 5.965478  | -1.225837 | -2.082415 | 80  | H | 1.001102  | 4.224169  | 5.294256  |
| 18 | C  | 7.552952  | -0.113977 | -0.237454 | 81  | H | 0.452560  | -2.722179 | -4.781209 |
| 19 | C  | 8.268788  | -0.268307 | 0.958264  | 82  | H | 2.928970  | -3.041668 | -5.289768 |
| 20 | C  | 8.295587  | 0.043350  | -1.411920 | 83  | H | 4.589094  | -2.121970 | -3.687702 |
| 21 | C  | 9.656839  | -0.267612 | 0.970098  | 84  | C | -5.667072 | -3.928376 | 1.497241  |
| 22 | H  | 7.727221  | -0.415220 | 1.888993  | 85  | C | -4.527403 | -5.411995 | 0.213284  |
| 23 | C  | 9.688163  | 0.040492  | -1.395358 | 86  | C | -6.060468 | -2.826789 | 2.256661  |
| 24 | H  | 7.776413  | 0.194704  | -2.354667 | 87  | C | -6.417059 | -5.124663 | 1.487073  |
| 25 | C  | 10.405249 | -0.114201 | -0.205639 | 88  | C | -3.631617 | -6.031963 | -0.657155 |
| 26 | H  | 10.166752 | -0.399514 | 1.921143  | 89  | C | -5.691897 | -6.069130 | 0.666774  |
| 27 | H  | 10.213813 | 0.173622  | -2.335214 | 90  | C | -7.248294 | -2.928979 | 2.972773  |
| 28 | C  | 3.121997  | -1.340070 | -2.343220 | 91  | H | -5.460548 | -1.924781 | 2.306820  |
| 29 | C  | 3.524817  | -2.010604 | -3.499952 | 92  | C | -7.602917 | -5.205098 | 2.216392  |
| 30 | C  | 0.850943  | -1.687850 | -2.969648 | 93  | C | -3.904307 | -7.341873 | -1.036080 |
| 31 | C  | 2.604552  | -2.523359 | -4.394833 | 94  | H | -2.757443 | -5.516521 | -1.038871 |
| 32 | C  | 1.218220  | -2.347588 | -4.111348 | 95  | C | -5.945318 | -7.382382 | 0.271525  |
| 33 | H  | -0.194682 | -1.533267 | -2.723467 | 96  | C | -8.017620 | -4.099408 | 2.949742  |
| 34 | Au | 1.370871  | -0.151698 | -0.298500 | 97  | H | -7.578270 | -2.083330 | 3.568527  |
| 35 | C  | -1.570012 | -1.245625 | -0.025663 | 98  | H | -8.187640 | -6.120374 | 2.217254  |
| 36 | C  | -1.586882 | 0.874198  | -0.608494 | 99  | C | -5.042235 | -8.015737 | -0.573946 |
| 37 | C  | -1.185662 | -2.546291 | 0.330563  | 100 | H | -3.219120 | -7.848021 | -1.709240 |
| 38 | C  | -2.949578 | -0.894826 | -0.122773 | 101 | H | -6.838179 | -7.897550 | 0.613577  |
| 39 | C  | -1.219343 | 2.182751  | -0.948135 | 102 | H | -8.939396 | -4.145742 | 3.521206  |
| 40 | C  | -2.959767 | 0.504225  | -0.510992 | 103 | H | -5.223466 | -9.038820 | -0.888324 |
| 41 | C  | -2.175833 | -3.480489 | 0.578619  | 104 | C | -5.716830 | 3.534448  | -2.087952 |
| 42 | H  | -0.136809 | -2.806275 | 0.428596  | 105 | C | -4.601762 | 4.997787  | -0.761377 |
| 43 | C  | -3.930912 | -1.832297 | 0.121417  | 106 | C | -6.094551 | 2.446211  | -2.874165 |
| 44 | C  | -2.223017 | 3.107329  | -1.182877 | 107 | C | -6.483619 | 4.719682  | -2.048306 |
| 45 | H  | -0.173429 | 2.457680  | -1.036502 | 108 | C | -3.716437 | 5.605851  | 0.128170  |
| 46 | C  | -3.954795 | 1.431741  | -0.742156 | 109 | C | -5.773841 | 5.651480  | -1.200830 |
| 47 | C  | -3.539248 | -3.140188 | 0.475930  | 110 | C | -7.282426 | 2.550057  | -3.589768 |
| 48 | H  | -1.906776 | -4.482978 | 0.891827  | 111 | H | -5.482682 | 1.553431  | -2.943424 |
| 49 | H  | -4.984250 | -1.595880 | 0.011911  | 112 | C | -7.669526 | 4.801740  | -2.777821 |
| 50 | C  | -3.580793 | 2.748032  | -1.080803 | 113 | C | -4.008046 | 6.900967  | 0.541973  |
| 51 | H  | -1.968267 | 4.118664  | -1.479482 | 114 | H | -2.836188 | 5.091785  | 0.498344  |
| 52 | H  | -5.004803 | 1.180868  | -0.631969 | 115 | C | -6.045590 | 6.950322  | -0.770747 |
| 53 | N  | -0.768172 | -0.181394 | -0.319002 | 116 | C | -8.067600 | 3.709302  | -3.539476 |
| 54 | N  | 1.743347  | -1.185371 | -2.076537 | 117 | H | -7.600405 | 1.714859  | -4.206481 |
| 55 | C  | 11.934171 | -0.120299 | -0.146382 | 118 | H | -8.267389 | 5.708279  | -2.756331 |
| 56 | C  | 12.568723 | 0.060895  | -1.527857 | 119 | C | -5.153677 | 7.572187  | 0.094621  |
| 57 | H  | 12.286016 | 1.015949  | -1.983117 | 120 | H | -3.331717 | 7.397691  | 1.231022  |
| 58 | H  | 13.659600 | 0.048426  | -1.434684 | 121 | H | -6.944023 | 7.463004  | -1.101889 |
| 59 | H  | 12.285552 | -0.744268 | -2.214052 | 122 | H | -8.989053 | 3.757177  | -4.111368 |
| 60 | C  | 12.414454 | 1.026253  | 0.758555  | 123 | H | -5.349372 | 8.583866  | 0.436150  |
| 61 | H  | 12.023973 | 0.930423  | 1.776255  | 124 | N | -4.519194 | -4.107458 | 0.719167  |
| 62 | H  | 13.508773 | 1.029484  | 0.819047  | 125 | N | -4.573938 | 3.708710  | -1.303130 |
| 63 | H  | 12.091858 | 1.995741  | 0.364857  |     |   |           |           |           |

**Table S13.** Cartesian coordinates of the optimized T<sub>1</sub> geometry of **3** computed by TDA-TDDFT/CPCM.

|    |    |            |           |           |     |   |            |           |           |
|----|----|------------|-----------|-----------|-----|---|------------|-----------|-----------|
| 1  | C  | -6.184844  | -0.408850 | -2.053449 | 64  | C | -15.459430 | -1.788178 | -0.892721 |
| 2  | C  | -4.805845  | -0.312913 | -1.718247 | 65  | H | -15.159173 | -1.086411 | -1.676733 |
| 3  | C  | -3.867359  | -0.147341 | -2.726186 | 66  | H | -15.055612 | -2.772806 | -1.150423 |
| 4  | C  | -4.239378  | -0.071554 | -4.083803 | 67  | H | -16.553338 | -1.854315 | -0.904269 |
| 5  | C  | -5.596875  | -0.167355 | -4.389778 | 68  | C | -3.156606  | 0.109373  | -5.150956 |
| 6  | C  | -6.558477  | -0.333545 | -3.389208 | 69  | C | -2.394255  | 1.419026  | -4.889521 |
| 7  | H  | -2.815733  | -0.074895 | -2.460845 | 70  | H | -3.070220  | 2.279209  | -4.936628 |
| 8  | H  | -5.929287  | -0.114135 | -5.420993 | 71  | H | -1.916474  | 1.420692  | -3.904909 |
| 9  | H  | -7.607704  | -0.404517 | -3.666407 | 72  | H | -1.610347  | 1.559657  | -5.642588 |
| 10 | C  | -7.080284  | -0.582279 | -0.899135 | 73  | C | -2.174166  | -1.072000 | -5.087534 |
| 11 | C  | -8.466931  | -0.708144 | -0.864875 | 74  | H | -1.387089  | -0.952994 | -5.841069 |
| 12 | C  | -6.387984  | -0.627349 | 0.310804  | 75  | H | -1.691555  | -1.146529 | -4.108083 |
| 13 | C  | -9.124399  | -0.872621 | 0.376490  | 76  | H | -2.690157  | -2.018353 | -5.280397 |
| 14 | H  | -9.049111  | -0.711980 | -1.781901 | 77  | C | -3.739511  | 0.170331  | -6.565444 |
| 15 | C  | -6.990746  | -0.789213 | 1.569638  | 78  | H | -2.929599  | 0.299315  | -7.290995 |
| 16 | C  | -8.396146  | -0.909420 | 1.567884  | 79  | H | -4.273537  | -0.749883 | -6.824579 |
| 17 | H  | -8.934930  | -1.004622 | 2.507147  | 80  | H | -4.428864  | 1.012781  | -6.684687 |
| 18 | C  | -10.599548 | -1.001006 | 0.412833  | 81  | H | -3.317334  | -0.783673 | 5.392801  |
| 19 | C  | -11.416044 | -0.254585 | -0.448599 | 82  | H | -5.756820  | -1.061269 | 6.073668  |
| 20 | C  | -11.235930 | -1.869947 | 1.304739  | 83  | H | -7.485316  | -1.065949 | 4.290268  |
| 21 | C  | -12.798551 | -0.373984 | -0.411248 | 84  | C | 2.910904   | -3.645966 | -1.327582 |
| 22 | H  | -10.959520 | 0.447787  | -1.140990 | 85  | C | 1.976574   | -5.081573 | 0.150087  |
| 23 | C  | -12.623422 | -1.984348 | 1.340297  | 86  | C | 3.167966   | -2.601552 | -2.215359 |
| 24 | H  | -10.635332 | -2.486570 | 1.968273  | 87  | C | 3.787434   | -4.747985 | -1.218854 |
| 25 | C  | -13.440816 | -1.240968 | 0.484234  | 88  | C | 1.178388   | -5.694001 | 1.115784  |
| 26 | H  | -13.389533 | 0.232732  | -1.092833 | 89  | C | 3.189826   | -5.665428 | -0.276005 |
| 27 | H  | -13.064168 | -2.679320 | 2.047467  | 90  | C | 4.341114   | -2.651824 | -2.954512 |
| 28 | C  | -6.090169  | -0.799789 | 2.692122  | 91  | H | 2.482411   | -1.769748 | -2.332402 |
| 29 | C  | -6.435493  | -0.947519 | 4.037059  | 92  | C | 4.947398   | -4.797535 | -1.987349 |
| 30 | C  | -3.800170  | -0.647761 | 3.329047  | 93  | C | 1.591635   | -6.920262 | 1.616069  |
| 31 | C  | -5.476935  | -0.945974 | 5.032953  | 94  | H | 0.258577   | -5.240911 | 1.467925  |
| 32 | C  | -4.110974  | -0.790493 | 4.654348  | 95  | C | 3.603897   | -6.884830 | 0.253708  |
| 33 | H  | -2.771658  | -0.528019 | 3.003522  | 96  | C | 5.228934   | -3.736538 | -2.845954 |
| 34 | Au | -4.443952  | -0.447133 | 0.279271  | 97  | H | 4.586085   | -1.839241 | -3.630692 |
| 35 | C  | -1.407199  | -1.248399 | 0.045168  | 98  | H | 5.617946   | -5.649773 | -1.939522 |
| 36 | C  | -1.609213  | 0.907183  | 0.423529  | 99  | C | 2.792432   | -7.517247 | 1.193367  |
| 37 | C  | -1.659952  | -2.607518 | -0.180031 | 100 | H | 0.976747   | -7.438044 | 2.344961  |
| 38 | C  | -0.072092  | -0.750845 | 0.084219  | 101 | H | 4.547371   | -7.334572 | -0.039463 |
| 39 | C  | -2.107949  | 2.197940  | 0.650793  | 102 | C | 2.221272   | 4.089956  | 1.639144  |
| 40 | C  | -0.203991  | 0.671348  | 0.342035  | 103 | C | 0.976500   | 5.312334  | 0.198195  |
| 41 | C  | -0.580257  | -3.455812 | -0.361752 | 104 | C | 2.705715   | 3.118275  | 2.514511  |
| 42 | H  | -2.678269  | -2.979084 | -0.230583 | 105 | C | 2.865636   | 5.338591  | 1.500254  |
| 43 | C  | 0.999505   | -1.603954 | -0.089748 | 106 | C | 0.040997   | 5.755082  | -0.736332 |
| 44 | C  | -1.204614  | 3.236374  | 0.792919  | 107 | C | 2.073400   | 6.117097  | 0.575463  |
| 45 | H  | -3.176157  | 2.371489  | 0.729987  | 108 | C | 3.863992   | 3.403020  | 3.222885  |
| 46 | C  | 0.690410   | 1.712578  | 0.481968  | 109 | H | 2.186674   | 2.178976  | 2.669344  |
| 47 | C  | 0.739465   | -2.969106 | -0.316390 | 110 | C | 4.037204   | 5.603444  | 2.203986  |
| 48 | H  | -0.747229  | -4.505987 | -0.574704 | 111 | C | 0.206504   | 7.026124  | -1.266855 |
| 49 | H  | 2.024465   | -1.253155 | -0.024298 | 112 | H | -0.778505  | 5.126760  | -1.066349 |
| 50 | C  | 0.182636   | 3.007090  | 0.710242  | 113 | C | 2.214906   | 7.398830  | 0.050375  |
| 51 | H  | -1.560956  | 4.238194  | 1.005612  | 114 | C | 4.537005   | 4.627486  | 3.064697  |
| 52 | H  | 1.760677   | 1.562457  | 0.383334  | 115 | H | 4.253799   | 2.678700  | 3.930570  |
| 53 | N  | -2.314823  | -0.246439 | 0.249181  | 116 | H | 4.561313   | 6.546941  | 2.088963  |
| 54 | N  | -4.731189  | -0.644257 | 2.339148  | 117 | C | 1.274239   | 7.851883  | -0.872745 |
| 55 | C  | -14.967726 | -1.339428 | 0.493210  | 118 | H | -0.490007  | 7.391201  | -2.014507 |
| 56 | C  | -15.477820 | -2.342826 | 1.530996  | 119 | H | 3.036327   | 8.041857  | 0.350173  |
| 57 | H  | -15.184206 | -2.060949 | 2.547681  | 120 | N | 1.814390   | -3.853142 | -0.491441 |
| 58 | H  | -16.571722 | -2.378112 | 1.500015  | 121 | N | 1.074398   | 4.079374  | 0.845500  |
| 59 | H  | -15.107937 | -3.354679 | 1.334340  | 122 | C | 6.477200   | -3.615808 | -5.003632 |
| 60 | C  | -15.564826 | 0.038913  | 0.822327  | 123 | C | 7.702296   | -3.899236 | -3.126259 |
| 61 | H  | -15.268136 | 0.795177  | 0.089240  | 124 | C | 5.444088   | -3.479076 | -5.931139 |
| 62 | H  | -16.659596 | -0.012573 | 0.825545  | 125 | C | 7.831644   | -3.675890 | -5.405651 |
| 63 | H  | -15.236697 | 0.380950  | 1.809395  | 126 | C | 8.135645   | -4.036124 | -1.807344 |

|     |   |           |            |           |     |   |           |           |           |
|-----|---|-----------|------------|-----------|-----|---|-----------|-----------|-----------|
| 127 | C | 8.614559  | -3.856270  | -4.205924 | 190 | C | 0.105913  | 12.412205 | -2.190907 |
| 128 | C | 5.792399  | -3.381948  | -7.273154 | 191 | C | 4.700296  | 9.751028  | -3.040740 |
| 129 | H | 4.404775  | -3.455664  | -5.620289 | 192 | H | 3.930084  | 7.994065  | -2.050270 |
| 130 | C | 8.154512  | -3.575635  | -6.761009 | 193 | C | 3.243686  | 11.683991 | -3.184363 |
| 131 | C | 9.503350  | -4.148769  | -1.587314 | 194 | C | -1.172965 | 12.385137 | -1.650431 |
| 132 | H | 7.433257  | -4.050333  | -0.980426 | 195 | H | -2.646955 | 11.242557 | -0.570320 |
| 133 | C | 9.984255  | -3.971835  | -3.957265 | 196 | H | 0.476391  | 13.303384 | -2.689831 |
| 134 | C | 7.131682  | -3.424758  | -7.688021 | 197 | C | 4.461251  | 11.071210 | -3.449765 |
| 135 | H | 5.006834  | -3.273823  | -8.015417 | 198 | H | 5.655767  | 9.286659  | -3.266912 |
| 136 | H | 9.190978  | -3.619800  | -7.083810 | 199 | H | 3.054838  | 12.702834 | -3.510923 |
| 137 | C | 10.421215 | -4.121431  | -2.647695 | 200 | H | -1.812193 | 13.259034 | -1.730873 |
| 138 | H | 9.866594  | -4.258558  | -0.569582 | 201 | H | 5.235100  | 11.615035 | -3.982874 |
| 139 | H | 10.696144 | -3.941342  | -4.777430 | 202 | N | 5.717810  | 4.871325  | 3.798078  |
| 140 | H | 7.367634  | -3.344346  | -8.744749 | 203 | N | 1.398190  | 9.142350  | -1.430809 |
| 141 | H | 11.482726 | -4.214515  | -2.439500 | 204 | N | 3.178821  | -8.763770 | 1.732462  |
| 142 | C | 3.486980  | -9.905344  | 0.998611  | 205 | N | 6.409676  | -3.751049 | -3.620251 |
| 143 | C | 3.319298  | -9.055999  | 3.085693  |     |   |           |           |           |
| 144 | C | 3.458497  | -10.104218 | -0.381808 |     |   |           |           |           |
| 145 | C | 3.828563  | -10.947355 | 1.891498  |     |   |           |           |           |
| 146 | C | 3.153072  | -8.223517  | 4.192704  |     |   |           |           |           |
| 147 | C | 3.722505  | -10.404259 | 3.225255  |     |   |           |           |           |
| 148 | C | 3.797432  | -11.365269 | -0.857699 |     |   |           |           |           |
| 149 | H | 3.176842  | -9.306943  | -1.061793 |     |   |           |           |           |
| 150 | C | 4.165453  | -12.205620 | 1.386882  |     |   |           |           |           |
| 151 | C | 3.378838  | -8.771338  | 5.449937  |     |   |           |           |           |
| 152 | H | 2.863236  | -7.184017  | 4.079662  |     |   |           |           |           |
| 153 | C | 3.942959  | -10.930022 | 4.500510  |     |   |           |           |           |
| 154 | C | 4.151663  | -12.406531 | 0.012930  |     |   |           |           |           |
| 155 | H | 3.784199  | -11.545994 | -1.928633 |     |   |           |           |           |
| 156 | H | 4.430120  | -13.015396 | 2.061138  |     |   |           |           |           |
| 157 | C | 3.765797  | -10.110389 | 5.607374  |     |   |           |           |           |
| 158 | H | 3.254543  | -8.144776  | 6.328416  |     |   |           |           |           |
| 159 | H | 4.252664  | -11.964217 | 4.622659  |     |   |           |           |           |
| 160 | H | 4.412665  | -13.378859 | -0.393609 |     |   |           |           |           |
| 161 | H | 3.931964  | -10.505943 | 6.604745  |     |   |           |           |           |
| 162 | C | 6.848787  | 4.060259   | 3.808033  |     |   |           |           |           |
| 163 | C | 5.948463  | 5.963217   | 4.630531  |     |   |           |           |           |
| 164 | C | 7.098460  | 2.881166   | 3.105613  |     |   |           |           |           |
| 165 | C | 7.820640  | 4.637429   | 4.657602  |     |   |           |           |           |
| 166 | C | 5.098917  | 7.018703   | 4.962271  |     |   |           |           |           |
| 167 | C | 7.245004  | 5.852780   | 5.183798  |     |   |           |           |           |
| 168 | C | 8.336236  | 2.274734   | 3.284575  |     |   |           |           |           |
| 169 | H | 6.357587  | 2.453291   | 2.438280  |     |   |           |           |           |
| 170 | C | 9.056795  | 4.007797   | 4.819821  |     |   |           |           |           |
| 171 | C | 5.579022  | 7.978340   | 5.845666  |     |   |           |           |           |
| 172 | H | 4.096458  | 7.088134   | 4.553019  |     |   |           |           |           |
| 173 | C | 7.703358  | 6.831018   | 6.069232  |     |   |           |           |           |
| 174 | C | 9.306322  | 2.825964   | 4.134514  |     |   |           |           |           |
| 175 | H | 8.555409  | 1.354983   | 2.750000  |     |   |           |           |           |
| 176 | H | 9.812668  | 4.440084   | 5.469526  |     |   |           |           |           |
| 177 | C | 6.867918  | 7.892179   | 6.392192  |     |   |           |           |           |
| 178 | H | 4.937707  | 8.811167   | 6.119122  |     |   |           |           |           |
| 179 | H | 8.697554  | 6.758834   | 6.501327  |     |   |           |           |           |
| 180 | H | 10.262270 | 2.324817   | 4.251981  |     |   |           |           |           |
| 181 | H | 7.211221  | 8.660911   | 7.077727  |     |   |           |           |           |
| 182 | C | 0.413843  | 10.126470  | -1.427510 |     |   |           |           |           |
| 183 | C | 2.524259  | 9.644517   | -2.077126 |     |   |           |           |           |
| 184 | C | -0.864443 | 10.097780  | -0.869646 |     |   |           |           |           |
| 185 | C | 0.912904  | 11.277569  | -2.079586 |     |   |           |           |           |
| 186 | C | 3.739773  | 9.018309   | -2.353489 |     |   |           |           |           |
| 187 | C | 2.260969  | 10.969396  | -2.495377 |     |   |           |           |           |
| 188 | C | -1.647007 | 11.239607  | -0.994330 |     |   |           |           |           |
| 189 | H | -1.235907 | 9.219618   | -0.351841 |     |   |           |           |           |

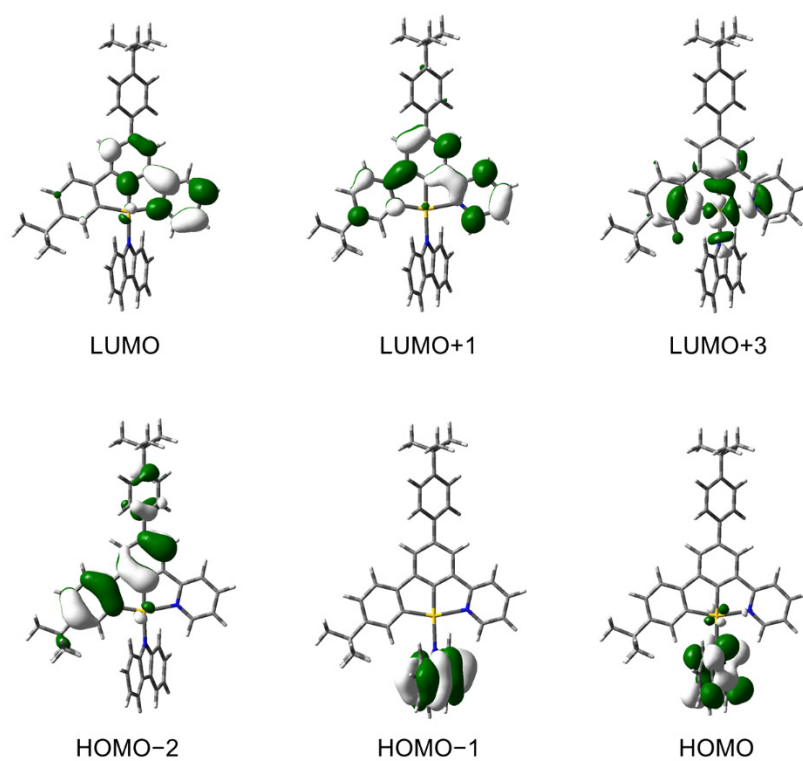

**Figure S11.** Spatial plots (isovalue = 0.03) of selected molecular orbitals of **1** at the optimized ground-state geometry.

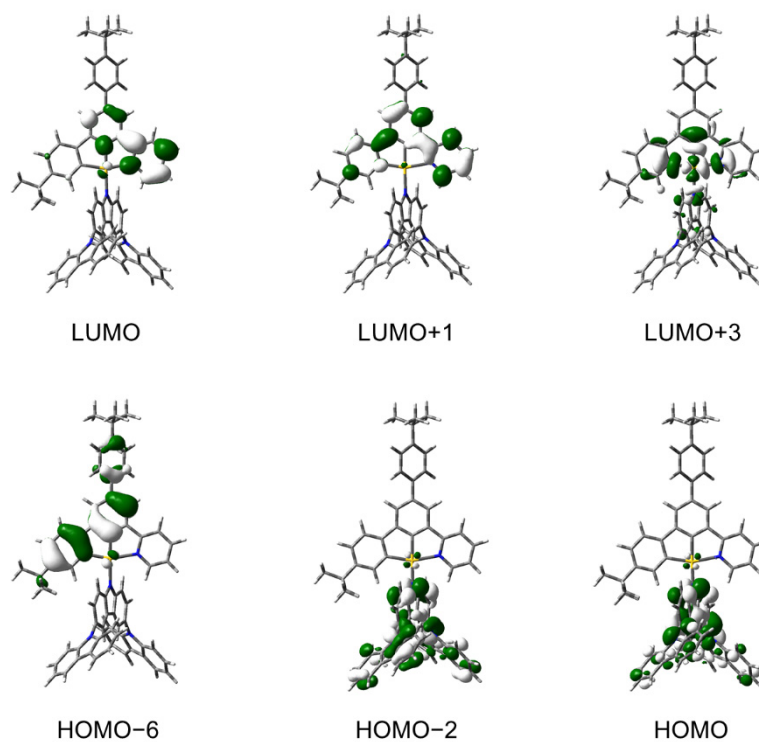

**Figure S12.** Spatial plots (isovalue = 0.03) of selected molecular orbitals of **2** at the

optimized ground-state geometry.

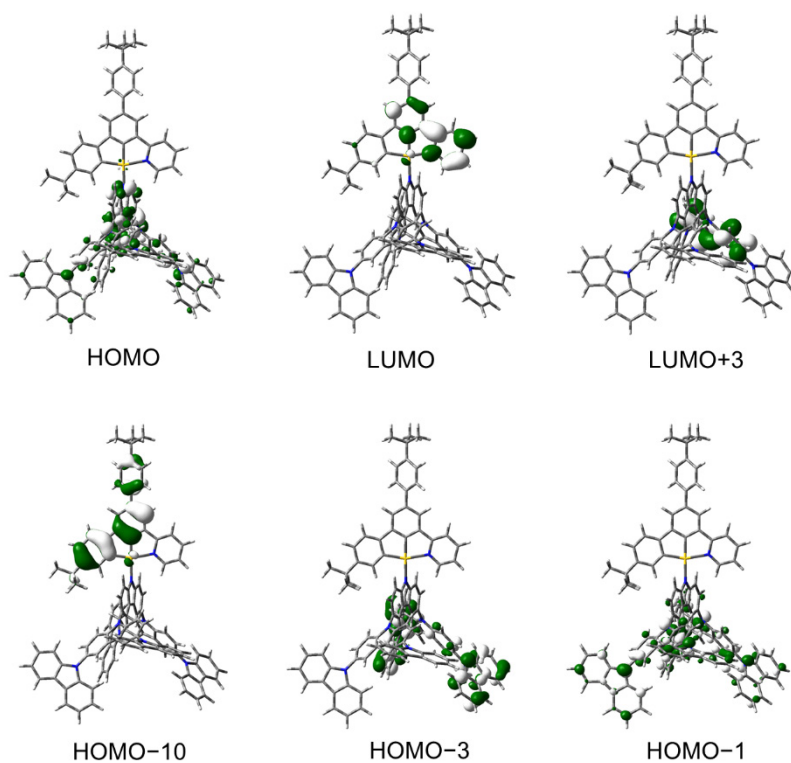

**Figure S13.** Spatial plots (isovalue = 0.03) of selected molecular orbitals of **3** at the optimized ground-state geometry.

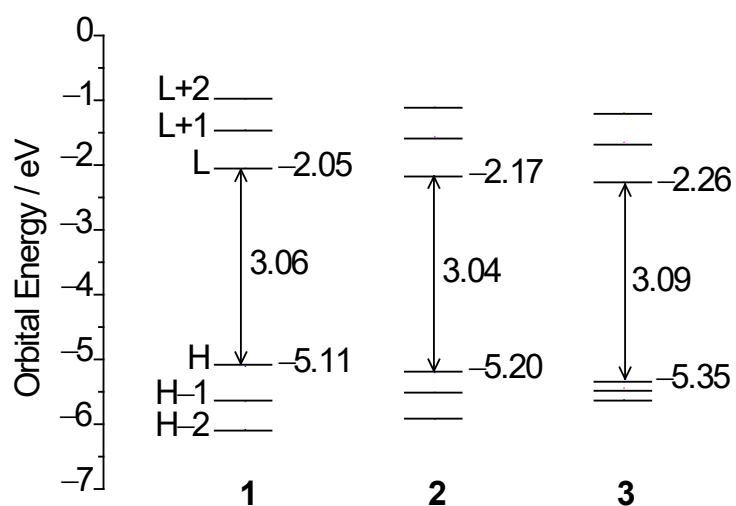

**Figure S14.** Orbital energy diagram of **1-3**.

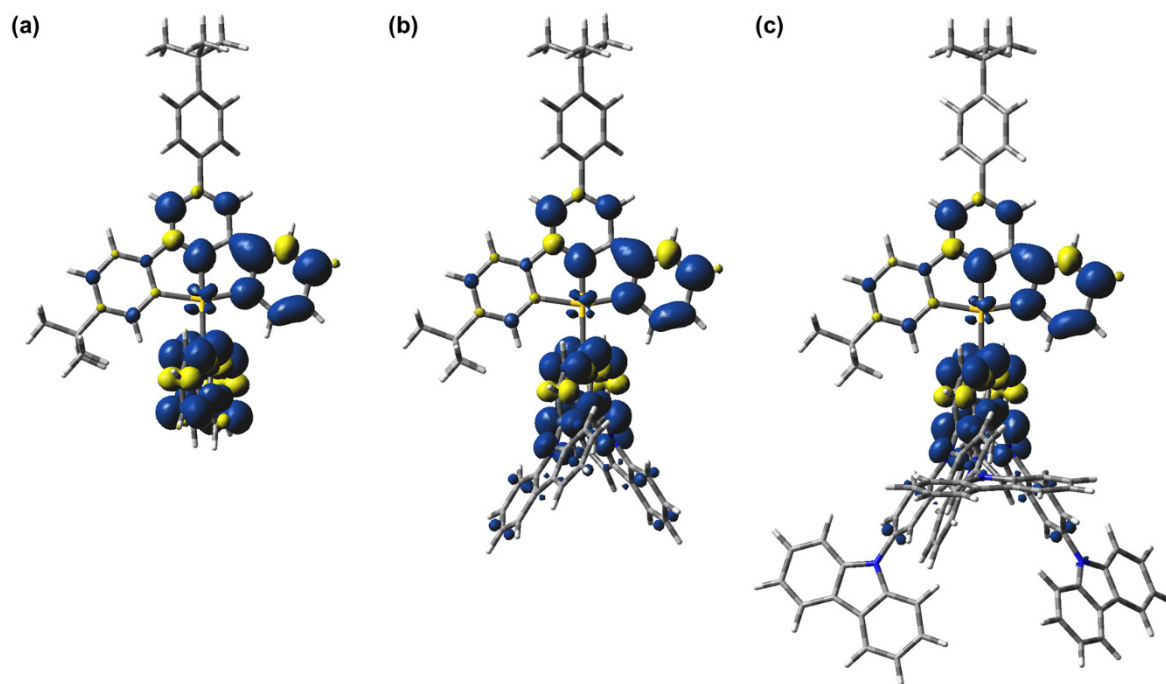

**Figure S15.** Plots of spin density (isovalue = 0.002) of the T<sub>1</sub> of (a) **1**, (b) **2** and (c) **3**.

## OLED Fabrication and Characterization

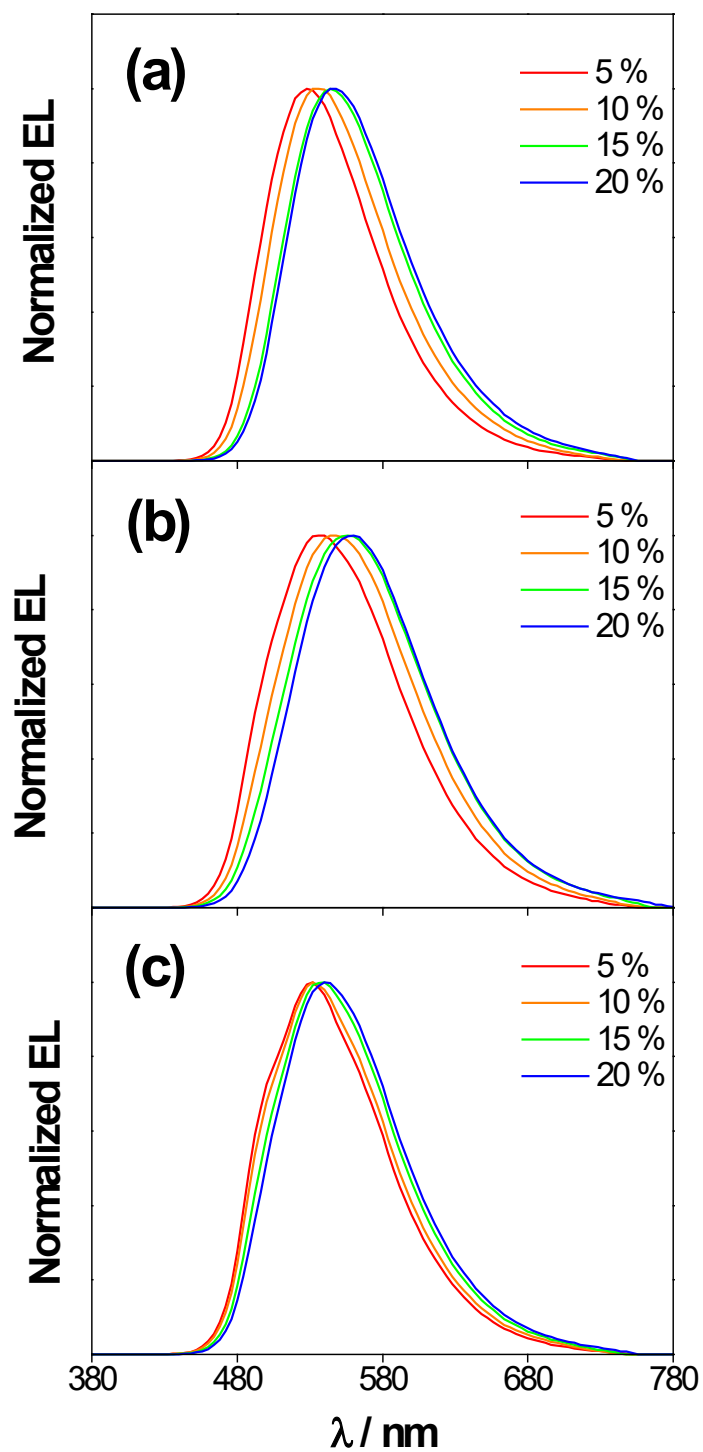

**Figure S16.** Normalized EL spectra of the solution-processed OLEDs based on 1–3.

**Table S14.** Key parameters of the solution-processed OLEDs based on **1–3**.

| Complex  | Conc. / wt% | CE <sup>a</sup> / cd A <sup>-1</sup> | PE <sup>b</sup> / lm W <sup>-1</sup> | EQE <sub>max</sub> <sup>c</sup> / % | EQE <sup>d</sup> / % | λ <sub>max</sub> <sup>e</sup> / nm | CIE <sup>f</sup> (x, y) |
|----------|-------------|--------------------------------------|--------------------------------------|-------------------------------------|----------------------|------------------------------------|-------------------------|
| <b>1</b> | 5           | 18.8                                 | 4.5                                  | 5.6                                 | 5.5                  | 528                                | 0.33, 0.58              |
|          | 10          | 35.9                                 | 13.7                                 | 10.6                                | 10.5                 | 536                                | 0.36, 0.58              |
|          | 15          | 35.5                                 | 15.6                                 | 10.5                                | 10.3                 | 544                                | 0.39, 0.57              |
|          | 20          | 40.0                                 | 15.7                                 | 11.9                                | 10.0                 | 548                                | 0.40, 0.57              |
| <b>2</b> | 5           | 7.2                                  | 2.0                                  | 2.2                                 | 2.0                  | 540                                | 0.36, 0.56              |
|          | 10          | 14.9                                 | 4.4                                  | 4.6                                 | 4.6                  | 544                                | 0.39, 0.55              |
|          | 15          | 26.5                                 | 9.5                                  | 8.4                                 | 8.4                  | 556                                | 0.42, 0.54              |
|          | 20          | 27.1                                 | 10.4                                 | 8.7                                 | 8.0                  | 560                                | 0.43, 0.54              |
| <b>3</b> | 5           | 41.2                                 | 32.1                                 | 12.5                                | 6.4                  | 532                                | 0.33, 0.57              |
|          | 10          | 45.9                                 | 32.7                                 | 13.9                                | 8.8                  | 532                                | 0.35, 0.57              |
|          | 15          | 47.2                                 | 33.3                                 | 14.3                                | 10.4                 | 540                                | 0.36, 0.57              |
|          | 20          | 52.6                                 | 41.3                                 | 15.8                                | 12.2                 | 540                                | 0.38, 0.57              |

<sup>a</sup> CE represents maximum current efficiency.<sup>b</sup> PE represents maximum power efficiency.<sup>c</sup> EQE<sub>max</sub> represents maximum external quantum efficiency.<sup>d</sup> EQE represents external quantum efficiency at luminance of 500 cd m<sup>-2</sup>.<sup>e</sup> λ<sub>max</sub> represents peak maximum.<sup>f</sup> CIE coordinates are taken at a luminance of 100 cd m<sup>-2</sup>.**Table S15.** Summary of the EL performance of some representative TADF-based solution-processed OLEDs.

| EML                    | CE <sup>a</sup> / cd A <sup>-1</sup> | PE <sup>b</sup> / lm W <sup>-1</sup> | EQE <sub>max</sub> <sup>c</sup> / % | λ <sub>max</sub> <sup>d</sup> / nm | Ref.      |
|------------------------|--------------------------------------|--------------------------------------|-------------------------------------|------------------------------------|-----------|
| <b>3</b> :CBP          | 52.6                                 | 41.3                                 | 15.8                                | 540                                | This work |
| 2PXZ-OXD:PVK:OXD-7     | 16.2                                 | 5.3                                  | 7.5                                 | 547                                | 1         |
| CDE1:CzSi              | 38.9                                 | 17.3                                 | 12.0                                |                                    | 2         |
| 4CzIPN:CBP/B4PyMPM     | 39.0                                 | 48.0                                 | 12.0                                | 525                                | 3         |
| TB-3PXZ:CzSi           | 41.5                                 | 32.6                                 | 13.9                                |                                    | 4         |
| TXO-PhCz:DCzDCN:SimCP2 | 55.6                                 | 47.2                                 | 18.9                                | 532                                | 5         |
| t4CzIPN:Xm-mCP         | 76.5                                 | 51.8                                 | 22.0                                | 532                                | 6         |
| DACT-II:DCzPPy         | 111.9                                | 89.9                                 | 30.8                                | 530                                | 7         |

<sup>a</sup> CE represents maximum current efficiency.<sup>b</sup> PE represents maximum power efficiency.<sup>c</sup> EQE<sub>max</sub> represents maximum external quantum efficiency.<sup>d</sup> λ<sub>max</sub> represents peak maximum.



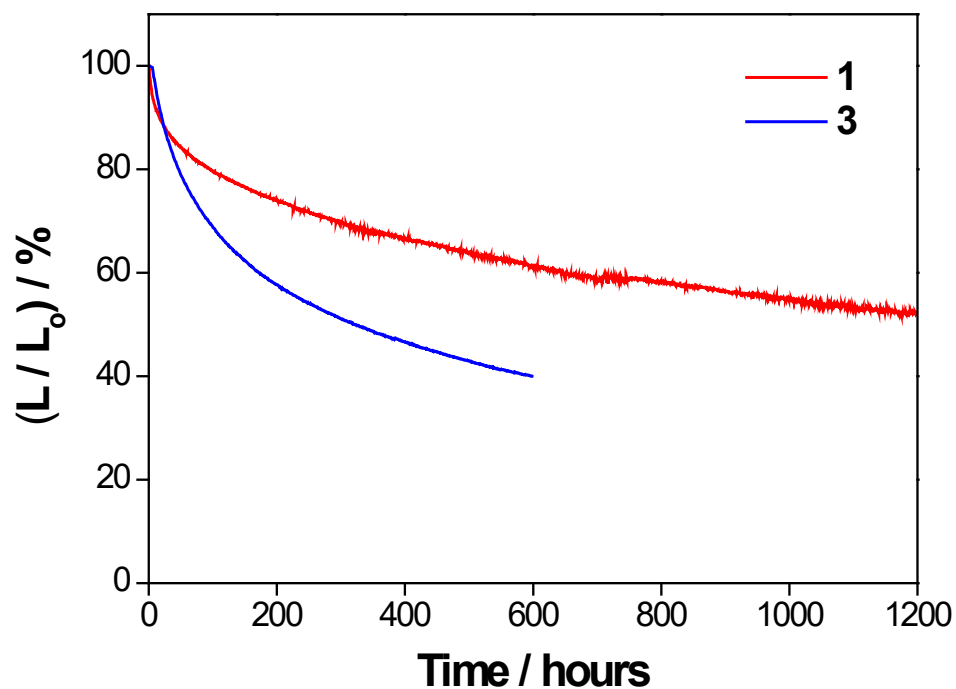

**Figure S17.** Relative luminance,  $L/L_0$ , of the solution-processed OLEDs based on **1** and **3**.

**Table S16.** Lifetime data of the solution-processed OLEDs based on **1** and **3**.

| Complex  | $L_0^a / \text{cd m}^{-2}$ | Lifetime / hours                                |                                             |                                               |
|----------|----------------------------|-------------------------------------------------|---------------------------------------------|-----------------------------------------------|
|          |                            | $\text{LT}_{70}^b$ at $1,000 \text{ cd m}^{-2}$ | $\text{LT}_{70}$ at $100 \text{ cd m}^{-2}$ | $\text{LT}_{50}^c$ at $100 \text{ cd m}^{-2}$ |
| <b>1</b> | 689                        | 6                                               | 295                                         | 1305                                          |
| <b>3</b> | 850                        | 2                                               | 94                                          | 322                                           |

<sup>a</sup>  $L_0$  is defined as the initial luminance.

<sup>b</sup>  $\text{LT}_{70}$  is defined as the operational lifetime at 70 % of initial luminance.

<sup>c</sup>  $\text{LT}_{50}$  is defined as the operational lifetime at 50 % of initial luminance.

## **Experimental Details**

**Materials and Reagents.** All solvents were purified and distilled using standard procedures before use. The carbazole-based dendrimers were prepared by Ullmann coupling reaction according to previously reported procedures,<sup>8</sup> and  $[\text{Au}\{4\text{-}^t\text{BuC}^{\wedge}\text{C}(4\text{-}^t\text{BuC}_6\text{H}_4)^{\wedge}\text{N}\}\text{Cl}]$  was prepared according to literature procedures.<sup>9,10</sup> **1–3** were synthesized by reacting the corresponding carbazole ligands with  $[\text{Au}\{4\text{-}^t\text{BuC}^{\wedge}\text{C}(4\text{-}^t\text{BuC}_6\text{H}_4)^{\wedge}\text{N}\}\text{Cl}]$  in the presence of sodium hydride in degassed tetrahydrofuran.<sup>10</sup> Tetra-*n*-butylammonium hexafluorophosphate (Aldrich, 98 %) was recrystallized more than three times from hot absolute ethanol before use. All reactions were performed under anaerobic conditions using standard Schlenk techniques under nitrogen atmosphere unless specified otherwise.

**Physical Measurements and Instrumentation.** The UV-vis absorption spectra were recorded on a Cary 60 UV/Vis (Agilent Technology) spectrophotometer equipped with a Xenon flash lamp. <sup>1</sup>H and <sup>13</sup>C{<sup>1</sup>H} NMR spectra were recorded on a Bruker Avance 600 (600 MHz for <sup>1</sup>H and 150 MHz for <sup>13</sup>C nuclei) Fourier-transform NMR spectrometer with chemical shifts reported relative to tetramethylsilane ( $\delta = 0$  ppm) with the residual solvent peak(s) in dimethyl sulfoxide ( $\delta = 2.50$  ppm) or dichloromethane ( $\delta = 5.32$  ppm) used as internal reference. High-resolution ESI mass spectra were recorded on Bruker maXis II<sup>TM</sup> High Resolution LC-QTOF Mass Spectrometer. Thermogravimetric analyses were performed with Q50 TGA (TA instruments), in which the decomposition temperature,  $T_d$ , is defined as the temperature at which the sample shows a 5 % weight loss. Steady-state excitation and emission spectra were recorded on a Horiba Scientific FluoroMax-4 spectrofluorometer equipped with a R928P PMT detector. Solid-state photophysical measurements were performed by loading the solid sample into a quartz tube inside a quartz-walled Dewar flask. Excited-state lifetimes of solution, solid, glass samples and thin films were measured using a conventional laser system. Liquid nitrogen was placed into the quartz-walled optical Dewar flask for low temperature (77 K) photophysical measurements. The excitation source used was the 355-nm output (third harmonic, 8 ns) of a Spectra-Physics Quanta-Ray Q-switched GCR-150 pulsed Nd:YAG laser (10 Hz). Luminescence decay signals were detected by a Hamamatsu R928 photomultiplier tube, recorded on a Tektronix model TDS-620A (500 MHz, 2 GSs<sup>-1</sup>) digital oscilloscope and analyzed with a program for exponential fits. Relative luminescence quantum yields were measured by the optical dilute method reported by Demas and Crosby.<sup>11</sup> A degassed solution of quinine sulfate in 0.5 M H<sub>2</sub>SO<sub>4</sub> ( $\Phi_{\text{lum}}=0.546$ , excitation wavelength at 365 nm) was used as

the reference,<sup>11</sup> while the absolute photoluminescence quantum yields (PLQYs) of thin films were measured on a Hamamatsu C9920-03 Absolute PLQY Measurement System. Cyclic voltammetry was performed with a CH Instruments Model CHI620E (CH Instruments, Inc.). All solutions for electrochemical measurements were purged with pre-purified argon gas prior to measurement.

### Synthesis and Characterization.

[Au{4-<sup>t</sup>BuC<sup>+</sup>C(4-<sup>t</sup>BuC<sub>6</sub>H<sub>4</sub>)<sup>-</sup>N} {(Cbz)-(Cbz)<sub>2</sub>}] (**2**). A mixture of [Au{4-<sup>t</sup>BuC<sup>+</sup>C(4-<sup>t</sup>BuC<sub>6</sub>H<sub>4</sub>)<sup>-</sup>N}Cl] (277 mg, 0.43 mmol), [(Cbz)-(Cbz)<sub>2</sub>] (233 mg, 0.47 mmol) and sodium hydride (15 mg, 0.64 mmol) in degassed tetrahydrofuran (50 mL) was refluxed for 4 h. The reaction mixture was then concentrated, and the crude product was washed with minimal amount of acetone. Subsequent recrystallization of the crude product by slow diffusion of diethyl ether vapor into a concentrated tetrahydrofuran solution of the complex gave a yellow solid. Yield: 237 mg, 50 %. <sup>1</sup>H NMR (600 MHz, DMSO-d<sub>6</sub>, 298 K, δ/ppm) δ 8.62 (d, *J* = 8.0 Hz, 1H, pyridyl proton), 8.53–8.49 (m, 3H, pyridyl proton and carbazolyl protons), 8.37–8.36 (m, 1H, pyridyl proton), 8.23 (d, *J* = 8.0 Hz, 4H, carbazolyl protons), 8.12 (s, 1H, -C<sub>6</sub>H<sub>2</sub>-), 7.96 (d, *J* = 8.5 Hz, 2H, carbazolyl protons), 7.85 (s, 1H, -C<sub>6</sub>H<sub>2</sub>-), 7.80 (d, *J* = 8.0 Hz, 2H, -C<sub>6</sub>H<sub>4</sub>-), 7.72–7.71 (m, 1H, pyridyl proton), 7.70 (d, *J* = 6.0 Hz, 1H, -C<sub>6</sub>H<sub>3</sub>-), 7.60 (d, *J* = 8.0 Hz, 2H, -C<sub>6</sub>H<sub>4</sub>-), 7.56–7.32 (m, 10H, carbazolyl protons), 7.26–7.19 (m, 4H, carbazolyl protons), 7.18–7.17 (m, 1H, -C<sub>6</sub>H<sub>3</sub>-), 6.42 (d, *J* = 2.0 Hz, 1H, -C<sub>6</sub>H<sub>3</sub>-), 1.35 (s, 9H, -<sup>t</sup>Bu), 0.94 (s, 9H, -<sup>t</sup>Bu). <sup>13</sup>C {<sup>1</sup>H} NMR (150 MHz, DMSO-d<sub>6</sub>, 298 K, δ/ppm): δ 163.76, 163.72, 152.05, 150.58, 150.37, 150.28, 149.31, 148.38, 147.66, 142.65, 142.13, 141.52, 141.42, 137.27, 130.54, 126.85, 126.03, 125.92, 125.67, 125.58, 124.78, 123.86, 122.60, 122.25, 122.02, 121.59, 121.12, 12.40, 119.50, 119.39, 115.34, 109.69, 34.39, 34.35, 31.14, 30.62. Elemental analyses: Found (%): C 70.74, H 4.89, N 4.78. Calcd for C<sub>67</sub>H<sub>53</sub>AuN<sub>4</sub>·1.5 H<sub>2</sub>O: C 70.70, H 4.96, N 4.92.

[Au{4-<sup>t</sup>BuC<sup>+</sup>C(4-<sup>t</sup>BuC<sub>6</sub>H<sub>4</sub>)<sup>-</sup>N} {(Cbz)-(Cbz)<sub>2</sub>-(Cbz)<sub>4</sub>}] (**3**). This complex was synthesized with a procedure similar to that of **2**, except that [(Cbz)-(Cbz)<sub>2</sub>-(Cbz)<sub>4</sub>] (118 mg, 0.10 mmol) was used instead of [(Cbz)-(Cbz)<sub>2</sub>]. Yellow crystals. Yield: 90 mg, 49 %. <sup>1</sup>H NMR (600 MHz, CD<sub>2</sub>Cl<sub>2</sub>, 298 K, δ/ppm) δ 8.62 (d, *J* = 2.5 Hz, 2H, carbazolyl protons), 8.56 (d, *J* = 5.0 Hz, 1H, pyridyl proton), 8.33 (d, *J* = 1.0 Hz, 4H, carbazolyl protons), 8.17–8.12 (m, 9H, pyridyl proton and carbazolyl protons), 8.07 (d, *J* = 8.5 Hz, 2H, carbazolyl protons), 7.78–7.67 (m, 10H, -C<sub>6</sub>H<sub>4</sub>-, -C<sub>6</sub>H<sub>2</sub>- protons and carbazolyl protons), 7.64–7.57 (m, 6H, -C<sub>6</sub>H<sub>4</sub>- and carbazolyl

protons), 7.50–7.48 (m, 1H, pyridyl proton), 7.46–7.38 (m, 18H,  $-\text{C}_6\text{H}_3-$  protons, carbazolyl protons), 7.29–7.23 (m, 9H, pyridyl proton and carbazolyl protons), 6.82 (d,  $J = 2.5$  Hz, 1H,  $-\text{C}_6\text{H}_3-$ ), 1.41 (s, 9H,  $-\text{tBu}$ ), 1.06 (s, 9H,  $-\text{tBu}$ ).  $^{13}\text{C}\{^1\text{H}\}$  NMR (150 MHz,  $\text{CD}_2\text{Cl}_2$ , 298 K,  $\delta/\text{ppm}$ ):  $\delta$  165.24, 165.11, 152.59, 152.12, 151.86, 151.78, 150.20, 149.55, 148.64, 142.93, 142.64, 142.43, 142.38, 142.25, 138.55, 132.08, 130.26, 127.39, 126.94, 126.61, 126.54, 126.49, 126.43, 125.68, 125.45, 124.85, 124.09, 123.57, 122.76, 122.65, 121.51, 121.20, 120.70, 120.14, 120.07, 115.95, 112.13, 110.32, 35.34, 35.11, 31.66, 31.28. Elemental analyses: Found (%): C 77.20, H 4.56, N 6.27. Calcd for  $\text{C}_{115}\text{H}_{81}\text{AuN}_8\cdot\text{H}_2\text{O}$ : C 77.17, H 4.67, N 6.26.

**Computational Details.** All calculations were carried out with the Gaussian 09 suite of programs.<sup>4</sup> By density functional theory (DFT), the ground-state ( $S_0$ ) geometries of **1–3** were fully optimized in toluene with the hybrid Perdew, Burke, and Ernzerhof (PBE0) functional,<sup>12</sup> in conjunction with the conductor-like polarizable continuum model (CPCM).<sup>13</sup> Time-dependent density functional theory<sup>14</sup> (TDDFT) calculations at the same level associated with CPCM were then carried out on the optimized  $S_0$  geometries to compute the singlet-singlet transitions in the electronic absorption spectra of **1–3**. In order to investigate the nature of the emissive states, the geometries of the lowest-lying triplet excited states ( $T_1$ ) were optimized with the unrestricted UPBE0/CPCM method for **1–3**. Vibrational frequency calculations were then performed on the stationary points to verify that each was a minimum (NIMAG = 0) on the potential energy surface (PES). In order to gain further insights into the excited states involved in TADF, the geometries of the lowest-lying singlet excited state ( $S_1$ ) and the lowest-lying triplet excited state ( $T_1$ ) were optimized using TDDFT with the Tamm-Dancoff approximation (TDA) method.<sup>15</sup> The Cartesian coordinates of the optimized  $S_0$ ,  $T_1$  and  $S_1$  geometries of the complexes are given in **Tables S4–S13**, while that of the optimized  $S_0$  and  $T_1$  geometries of **1** are reported in the previous literature.<sup>10</sup> For all the calculations, the effective core potentials (ECPs) and the associated basis set were used to describe Au<sup>16</sup> with f-type polarization functions ( $\zeta = 1.050$ ),<sup>17</sup> while the 6-31G(d,p) basis set<sup>11</sup> was applied for all other atoms. All the DFT and TDDFT calculations were carried out with a pruned (99,590) grid for numerical integration. To calculate the rate constants of fluorescence ( $k_f$ ) and phosphorescence ( $k_p$ ) of **1**, the geometries of the  $S_1$  and  $T_1$  states have been optimized in toluene at the PBE0/TZP level by TDDFT using the Amsterdam Density Functional (ADF) program,<sup>19</sup> with spin-orbit coupling (SOC) included in the TDDFT calculation of the  $T_1$  state. The computed  $k_f$  and  $k_p$  values were used to determine the average radiative decay rate constant ( $k_{r,\text{avg}}$ ) by the equation of the two-level model,<sup>20</sup> and the rate constants of intersystem crossing (ISC) and reverse ISC

(RISC) were calculated by the following equation,<sup>21</sup>

$$k_{ISC \text{ or } RISC} = \frac{2\pi}{\hbar} |V_{SOC}|^2 \times \rho_{FCWD}$$

where  $|V_{SOC}|^2$  is the coupling term of the matrix representation of the SOC operator ( $\hat{H}_{SOC}$ ), and  $\rho_{FCWD}$  is the Frank-Condon-weighted density of states which describes the thermokinetic barrier associated with the  $T_1 \rightarrow S_1$  transition.<sup>22</sup>

$$\rho_{FCWD}^{SCMT} = \frac{1}{\sqrt{4\pi\lambda k_B T}} \exp\left(-\frac{(\Delta E_{ST} + \lambda)^2}{4\lambda k_B T}\right)$$

where  $k_B$  is the Boltzmann constant,  $T$  is the temperature, and  $\lambda$  is the reorganization energy,

$$\lambda = E_{S_1/T_1} - E_{S_1/S_1}$$

in which  $E_{S_1/T_1}$  and  $E_{S_1/S_1}$  are the energies of the  $S_1$  state at the optimized  $T_1$  and  $S_1$  geometries, respectively.

**OLED Fabrication and Characterization.** Solution-processed organic light-emitting devices (OLEDs) were fabricated on patterned indium-tin oxide (ITO)-coated glass substrates. The substrates were cleaned with Decon 90, rinsed with deionized water, then dried in an oven, and finally treated in an ultraviolet ozone chamber. A 40 nm thick poly(ethylenedioxythiophene):poly(styrene sulfonic acid) (PEDOT:PSS) layer was spin-coated onto the ITO-coated glass substrates as the hole-transporting layer. After that, the emissive layer was formed by mixing gold(III) dendrimer with 1,3-bis(carbazol-9-yl)benzene (mCP) to prepare a  $10 \text{ mg cm}^{-3}$  solution in chloroform and spin-coating onto the PEDOT:PSS layer to give a 30 nm thick uniform thin film. Onto this, a 5 nm thick tris(2,4,6-trimethyl-3-(pyridin-3-yl)phenyl)borane (3TPYMB) and a 30 nm thick 1,3,5-tri[(3-pyridyl)-phen-3-yl]benzene (TmPyPB) were evaporated as a hole-blocking layer and an electron-transporting layer, respectively; while LiF (1 nm)/Al (120 nm) was used as the metal cathode. The emissive area of each pixel was  $0.1 \text{ cm}^2$ . Current density–voltage–luminance characteristics and electroluminescence (EL) spectra were measured simultaneously with a programmable Keithley model 2420 power source and a Photoresearch PR-655 spectrometer. The operational lifetime of the solution-processed devices were measured by a McScience M6000 OLED lifetime test system.

## References

1. Kumar, M.; Chapran, M.; Wiosna-Salyga, G.; Ślęczkowski, P.; Łuszczynska, B.; Pereira, L., *J. Phys. Chem. C* **2020**, *124* (40), 21935.
2. Li, Y.; Xie, G.; Gong, S.; Wu, K.; Yang, C., *Chem. Sci.* **2016**, *7* (8), 5441.
3. R. Komatsu, H. Sasabe, S. Inomata, Y.-J. Pu, J. Kido, *Synth. Metals* **2015**, *202*, 165.
4. Liu, Y.; Xie, G.; Wu, K.; Luo, Z.; Zhou, T.; Zeng, X.; Yu, J.; Gong, S.; Yang, C., *J. Mater. Chem. C* **2016**, *4* (20), 4402.
5. Liu, Y.; Wei, X.; Li, Z.; Liu, J.; Wang, R.; Hu, X.; Wang, P.; Yamada-Takamura, Y.; Qi, T.; Wang, Y., *ACS Appl. Energy Mater.* **2018**, *1* (2), 543.
6. Kim, C. Y.; Lee, C. H.; Kim, H. J.; Hwang, J.; Godumala, M.; Jeong, J.-E.; Woo, H. Y.; Cho, M. J.; Park, S.; Choi, D. H., *J. Mater. Chem. C* **2020**, *8* (20), 6780.
7. Tsai, K.-W.; Hung, M.-K.; Mao, Y.-H.; Chen, S.-A., *Adv. Funct. Mater.* **2019**, *29* (15), 1901025.
8. Albrecht, K.; Yamamoto, K., *J. Am. Chem. Soc.* **2009**, *131* (6), 2244.
9. Kumar, R.; Linden, A.; Nevado, C., *Angew. Chem. Int. Ed.* **2015**, *54* (48), 14287.
10. Li, L.-K.; Tang, M.-C.; Lai, S.-L.; Ng, M.; Kwok, W.-K.; Chan, M.-Y.; Yam, V. W.-W., *Nat. Photon.* **2019**, *13*, 185.
11. Frisch, M. J.; Trucks, G. W.; Schlegel, H. B.; Scuseria, G. E.; Robb, M. A.; Cheeseman, J. R.; Scalmani, G.; Barone, V.; Mennucci, B.; Petersson, G. A.; Nakatsuji, H.; Caricato, M.; Li, X.; Hratchian, H. P.; Izmaylov, A. F.; Bloino, J.; Zheng, G.; Sonnenberg, J. L.; Hada, M.; Ehara, M.; Toyota, K.; Fukuda, R.; Hasegawa, J.; Ishida, M.; Nakajima, T.; Honda, Y.; Kitao, O.; Nakai, H.; Vreven, T.; Montgomery, Jr., J. A.; Peralta, J. E.; Ogliaro, F.; Bearpark, M.; Heyd, J. J.; Brothers, E.; Kudin, K. N.; Staroverov, V. N.; Keith, T.; Kobayashi, R.; Normand, J.; Raghavachari, K.; Rendell, A.; Burant, J. C.; Iyengar, S. S.; Tomasi, J.; Cossi, M.; Rega, N.; Millam, J. M.; Klene, M.; Knox, J. E.; Cross, J. B.; Bakken, V.; Adamo, C.; Jaramillo, J.; Gomperts, R.; Stratmann, R. E.; Yazyev, O.; Austin, A. J.; Cammi, R.; Pomelli, C.; Ochterski, J. W.; Martin, R. L.; Morokuma, K.; Zakrzewski, V. G.; Voth, G. A.; Salvador, P.; Dannenberg, J. J.; Dapprich, S.; Daniels, A. D.; Farkas, O.; Foresman, J. B.; Ortiz, J. V.; Cioslowski, J.; Fox, D. J. *Gaussian 09* (Revision D.01), Gaussian, Inc.: Wallingford CT, 2013.
12. (a) Perdew, J. P.; Burke, K.; Ernzerhof, M., *Phys. Rev. Lett.* 1996, *77* (18), 3865. (b) Perdew, J. P.; Burke, K.; Ernzerhof, M., *Phys. Rev. Lett.* 1997, *78* (7), 1396. (c) Adamo, C.; Barone, V., *J. Chem. Phys.* **1999**, *110* (13), 6158.

13. (a) Barone, V.; Cossi, M., *J. Phys. Chem. A* **1998**, *102* (11), 1995. (b) Cossi, M.; Rega, N.; Scalmani, G.; Barone, V., *J. Comput. Chem.* **2003**, *24* (6), 669.
14. (a) Stratmann, R. E.; Scuseria, G. E.; Frisch, M. J., *J. Chem. Phys.* **1998**, *109* (19), 8218. (b) Bauernschmitt, R.; Ahlrichs, R., *Chem. Phys. Lett.* **1996**, *256* (4–5), 454. (c) Casida, M. E.; Jamorski, C.; Casida, K. C.; Salahub, D. R., *J. Chem. Phys.* **1998**, *108* (11), 4439.
15. Hirata, S.; Head-Gordon, M., *Chem. Phys. Lett.* **1999**, *314* (3–4), 291.
16. Andrae, D.; Haussermann, U.; Dolg, M.; Stoll, H.; Preuss, H., *Theor. Chim. Acta.* **1990**, *77* (2), 123.
17. Ehlers, A. W.; Böhme, M.; Dapprich, S.; Gobbi, A.; Höllwarth, A.; Jonas, V.; Köhler, K. F.; Stegmann, R.; Veldkamp, A.; Frenking, G., *Chem. Phys. Lett.* **1993**, *208* (1–2), 111.
18. (a) Hehre, W. J.; Ditchfie.R; Pople, J. A., *J. Chem. Phys.* **1972**, *56* (5), 2257. (b) Hariharan, P. C.; Pople, J. A., *Theor. Chim. Acta.* **1973**, *28* (3), 213. (c) Francl, M. M.; Pietro, W. J.; Hehre, W. J.; Binkley, J. S.; Gordon, M. S.; Defrees, D. J.; Pople, J. A., *J. Chem. Phys.* **1982**, *77* (7), 3654.
19. (a) te Velde, G.; Bickelhaupt, F. M.; Baerends, E. J.; Guerra, C. F.; Van Gisbergen, S. J. A.; Snijders, J. G.; Ziegler, T., *J. Comput. Chem.* **2001**, *22* (9), 931. (b) Guerra, C. F.; Snijders, J. G.; te Velde, G.; Baerends, E. J., *Theor. Chem. Acc.* **1998**, *99* (6), 391. (c) ADF2017, SCM, Theoretical Chemistry, Vrije Universiteit, Amsterdam, The Netherlands, <http://www.scm.com>.
20. (a) Hamze, R.; Shi, S.; Kapper, S. C.; Ravinson, D. S. M.; Estergreen, L.; Jung, M. C.; Tadle, A. C.; Haiges, R.; Djurovich, P. I.; Peltier, J. L.; Jazzar, R.; Bertrand, G.; Bradforth, S. E.; Thompson, M. E., *J. Am. Chem. Soc.* **2019**, *141* (21), 8616. (b) Hamze, R.; Shi, S. Y.; Kapper, S. C.; Ravinson, D. S. M.; Estergreen, L.; Jung, M. C.; Tadle, A. C.; Haiges, R.; Djurovich, P. I.; Peltier, J. L.; Jazzar, R.; Bertrand, G.; Bradforth, S. E.; Thompson, M. E., *J. Am. Chem. Soc.* **2019**, *141* (25), 10118.
21. Marian, C. M.; Föllner, J.; Kleinschmidt, M.; Etinski, M., Intersystem Crossing Processes in TADF Emitters: Materials Based on Thermally Activated Delayed Fluorescence. In *Highly Efficient OLEDs*, Yersin, H., Ed. Wiley-VCH Verlag GmbH & Co.: **2018**; pp 257.
22. (a) Balzani, V.; Juris, A.; Venturi, M.; Campagna, S.; Serroni, S., *Chem. Rev.* **1996**, *96* (2), 759. (b) Beljonne, D.; Shuai, Z.; Pourtois, G.; Bredas, J. L., *J. Phys. Chem. A* **2001**, *105* (15), 3899. (c) Velardo, A.; Borrelli, R.; Peluso, A.; Capobianco, A., *J. Phys. Chem. C* **2016**, *120* (43), 24605.
